# Supplementary material for: Regulation of translation by methylation multiplicity of 18S rRNA
Source: PubMed Central journal article supplement — Cell Rep. Author manuscript; Available in PMC 2021 Apr 23. (PMC8063911; doi:10.1016/j.celrep.2021.108825), 2021-03-09
Supplement: NIHMS1683102-supplement-1.pdf [file NIHMS1683102-supplement-1.pdf]

**Cell Reports, Volume 34**

**Supplemental information**

**Regulation of translation**

**by methylation multiplicity of 18S rRNA**

**Kuanqing Liu, Daniel A. Santos, Jeffrey A. Hussmann, Yun Wang, Benjamin M. Sutter, Jonathan S. Weissman, and Benjamin P. Tu**

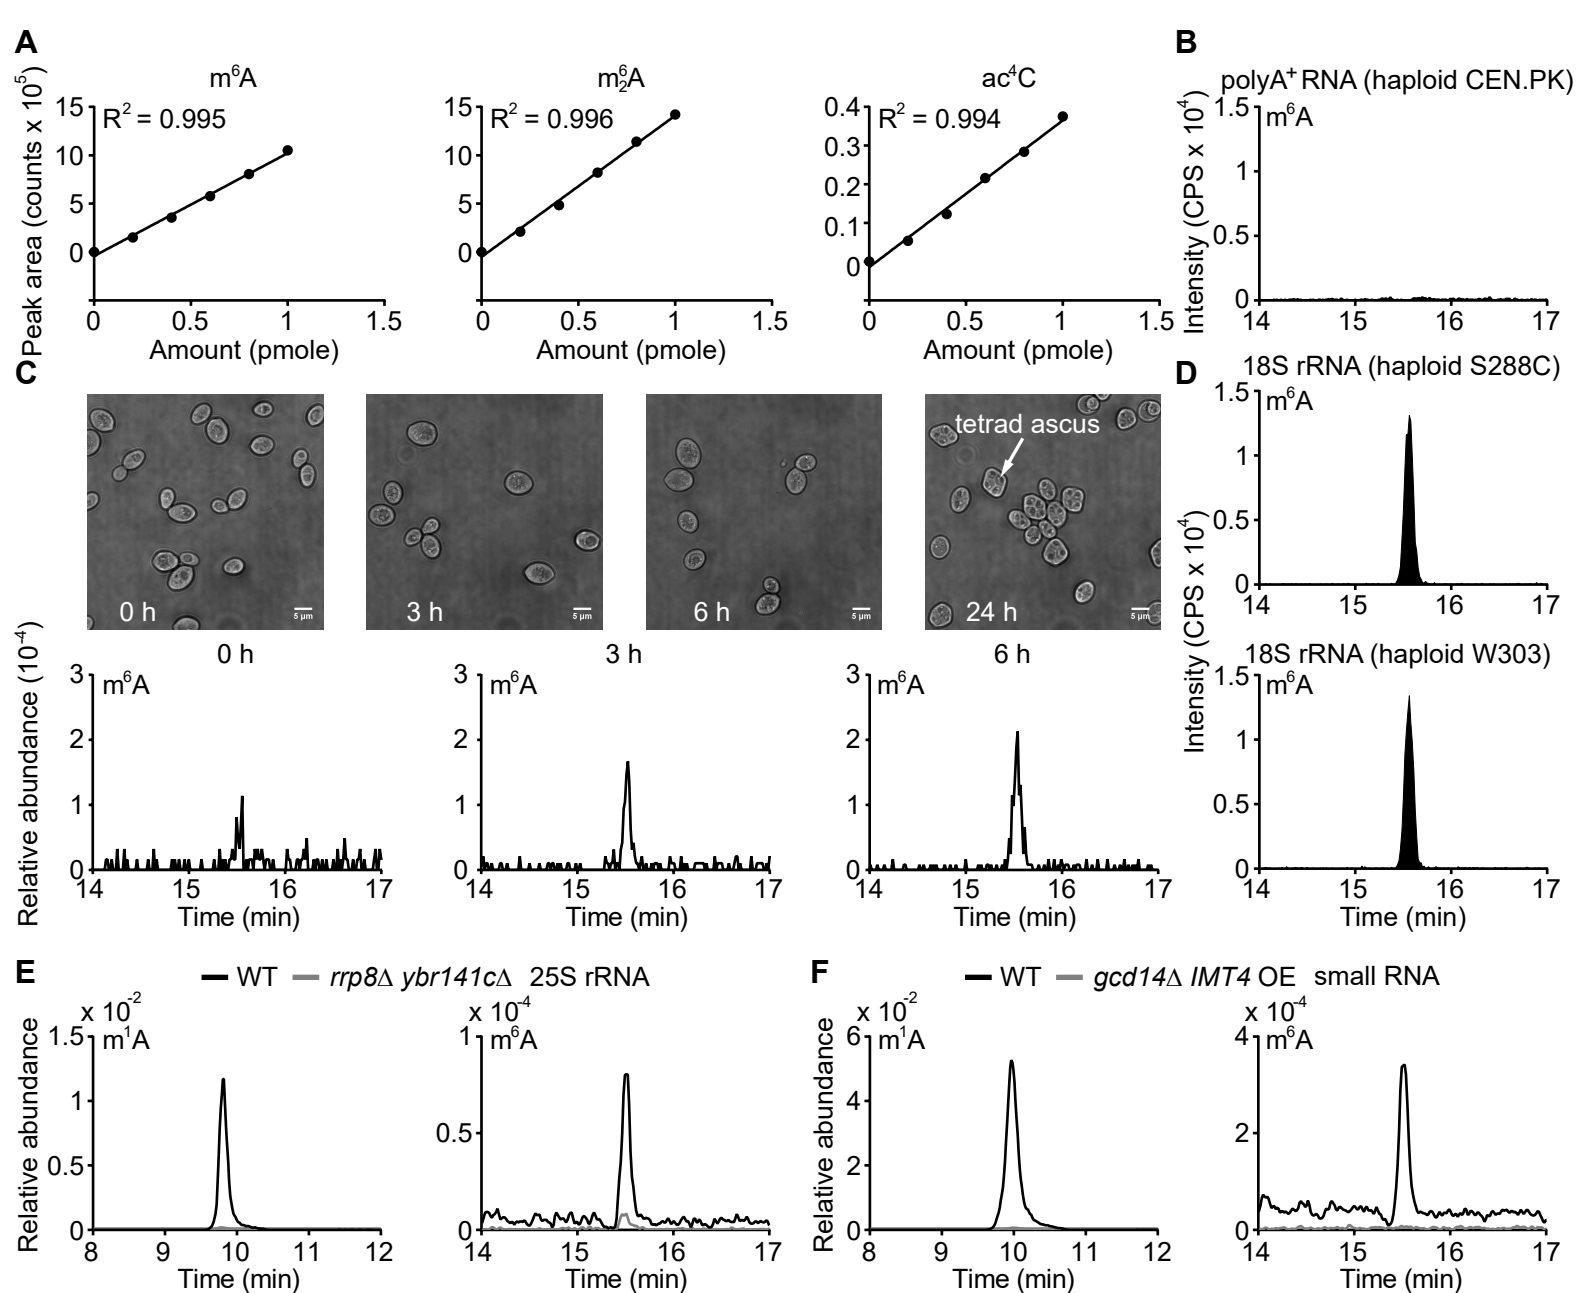

**Figure S1. Detection of  $m^6A$  in 18S rRNA from vegetatively growing haploid yeast cells.** Related to Figure 1.

(A) Standard curves for  $m^6A$ ,  $m^6_2A$ , and  $ac^4C$ . (B)  $m^6A$  is not detected in polyA<sup>+</sup> RNA from vegetatively growing haploid yeast (CEN.PK). (C)  $m^6A$  levels in polyA<sup>+</sup> RNA increase during sporulation. KL139 (CEN.PK diploid) was induced to sporulate as described exactly by Agarwala et al. (Agarwala et al. 2012). Samples were collected, immediately (0 h), three (3 h), and six hours (6 h) after cells were resuspended in sporulation medium (0.3% potassium acetate). Total RNA was isolated as described in STAR METHODS and polyA<sup>+</sup> RNA was purified from total RNA using the Dynabeads mRNA kit (Invitrogen). Approximately 1  $\mu$ g polyA<sup>+</sup> RNA was digested and analyzed by LC-MS/MS. Each chromatogram was normalized by the abundance of adenosine to allow for comparison between time points. Scale bar = 5  $\mu$ m. (D)  $m^6A$  is detected in 18S rRNA isolated from vegetatively growing haploid yeast cells (strains: S288C and W303).  $m^6A$  detected in 25S (E) and small RNA (F) is likely derived from  $m^1A$  via Dimroth rearrangement. OE: overexpression.  $m^1A$  and  $m^6A$  can be detected by the same MRM transition (282/150), but are eluted at different times. Each chromatogram was normalized by the abundance of adenosine to allow for comparison between different conditions. The essential tRNA  $m^1A$  methyltransferase Gcd14p becomes dispensable when the initiator methionyl tRNA gene *IMT4* is overexpressed (Calvo O, et al. 1999).

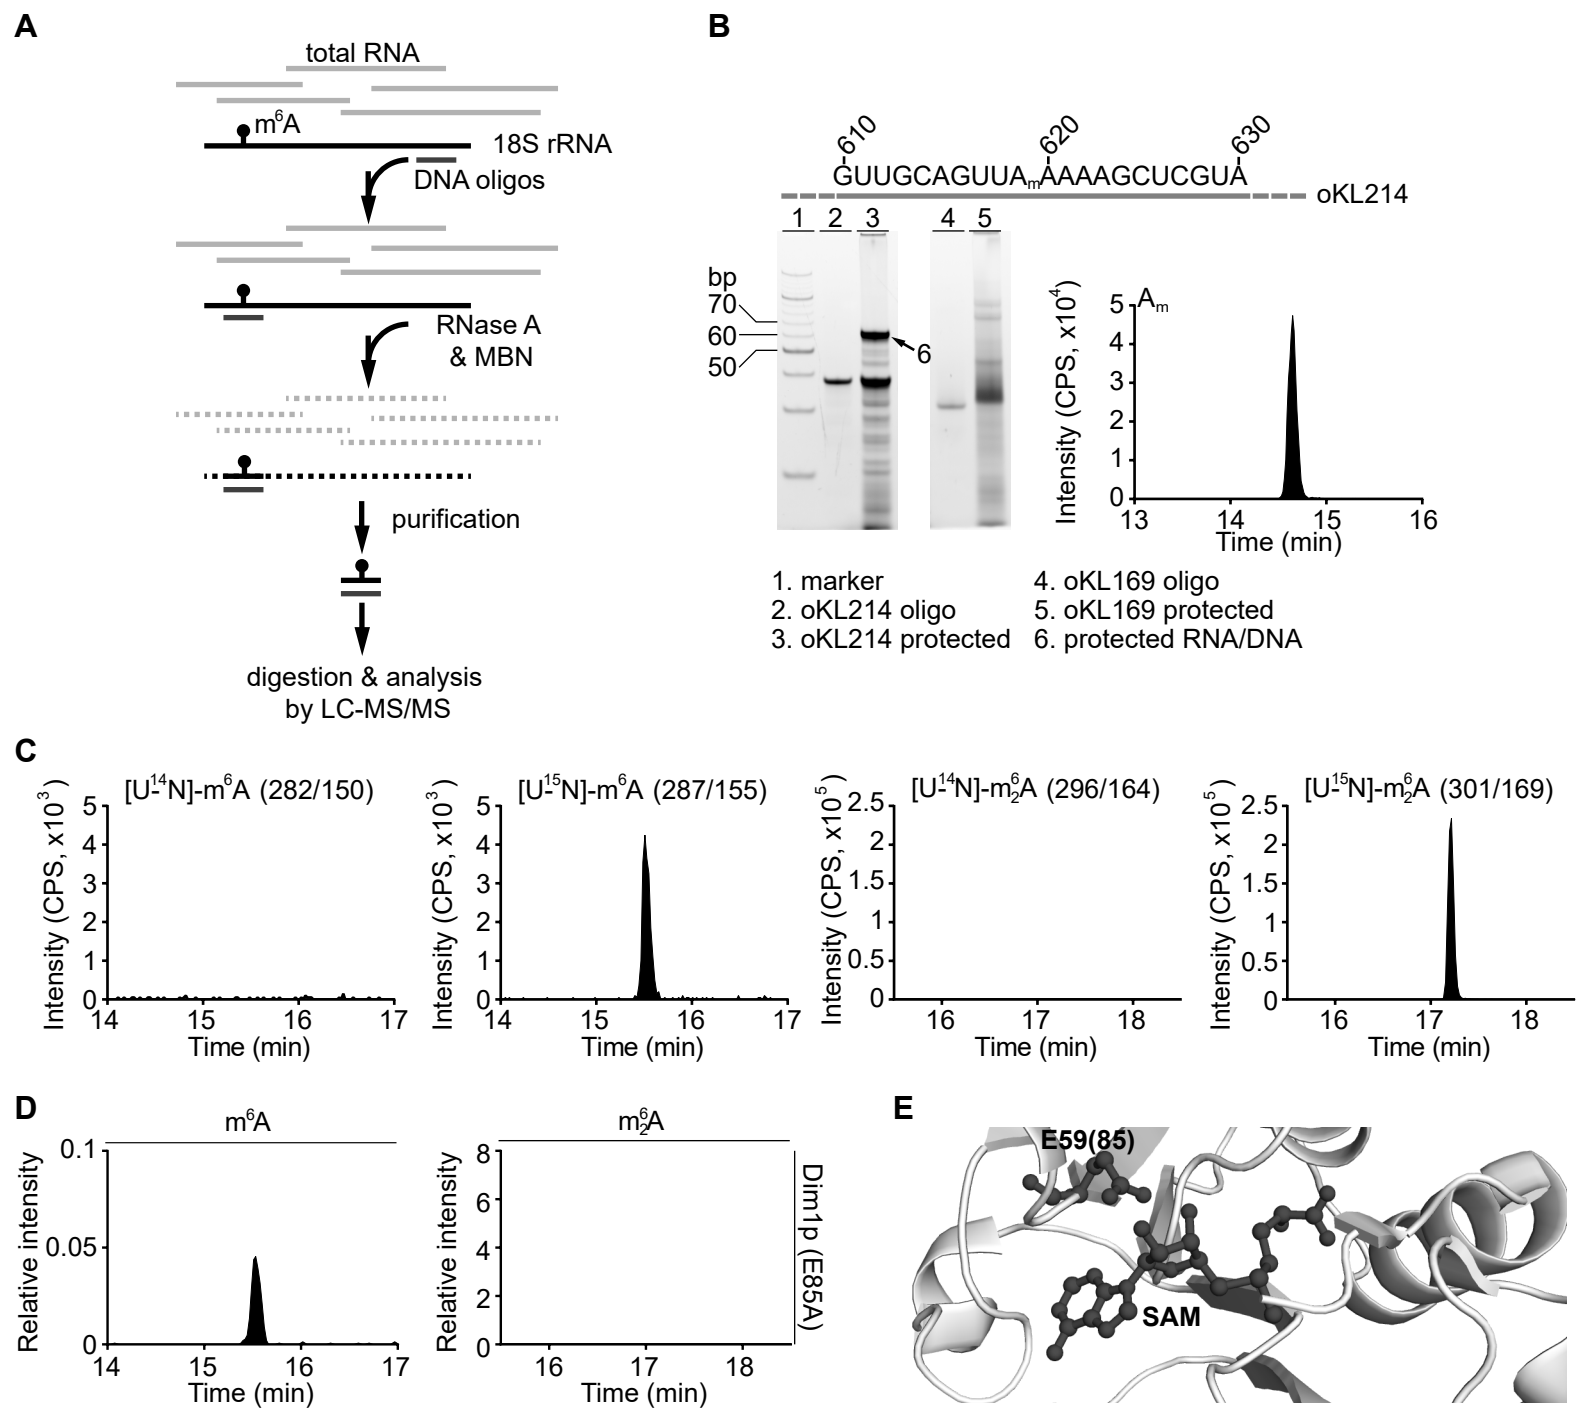

**Figure S2. Validation of m<sup>6</sup>A in yeast 18S rRNA.** Related to Figure 1.

**(A)** Schematic of the mung bean nuclease (MBN) protection assay. **(B)** Detection of the expected 2'-O-methyladenosine(A<sub>m</sub>) at 619 in 18S rRNA. oKL169 is not complementary to any yeast RNA and thus did not yield a RNA/DNA hybrid after digestion by RNase A and MBN. **(C)** m<sup>6</sup>A and m<sub>2</sub>A are derived from growing yeast cells, not from contamination during sample processing. WT cells were grown from a single colony in [<sup>15</sup>N] SD (1.7 g L<sup>-1</sup> yeast nitrogen base without ammonium sulfate and amino acids (BD Difco), 2% glucose, and 5 g L<sup>-1</sup> (<sup>15</sup>NH)<sub>2</sub>SO<sub>4</sub> (ISOTEC). Cells were diluted in the same medium with a starting OD<sub>600</sub> ~0.01 and grown to saturation. Cells were then diluted in the same medium with a starting OD<sub>600</sub> ~0.1 and grown to log phase before harvest. Total RNA was isolated and the 3' fragment of 18S rRNA was isolated using the MBN protection assay with oKL204 and analyzed by LC-MS/MS. **(D)** The Dim1p (E85A) mutant is still able to synthesize m<sup>6</sup>A, but not m<sub>2</sub>A. **(E)** Active site of *Methanocaldococcus jannaschii* Dim1. The structure was adapted from PDB#3GRY (O'Farrell et al. 2010) and prepared using Pymol (<https://pymol.org>). The number in parentheses corresponds to the position in *S. cerevisiae* Dim1p.



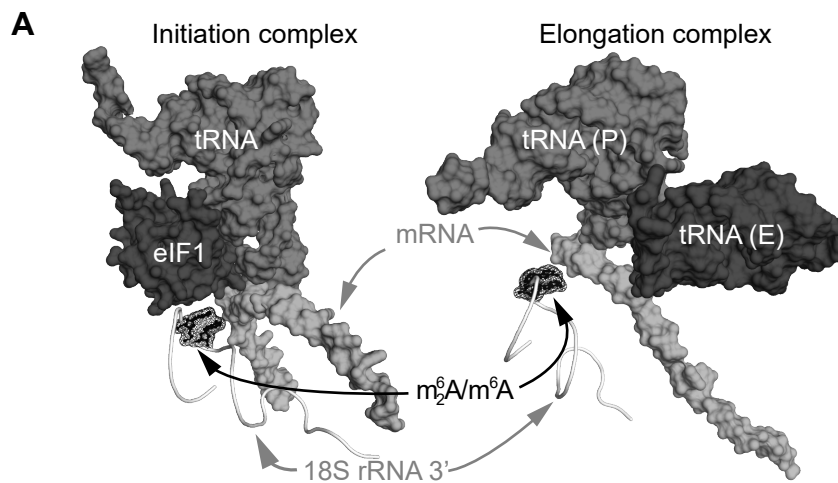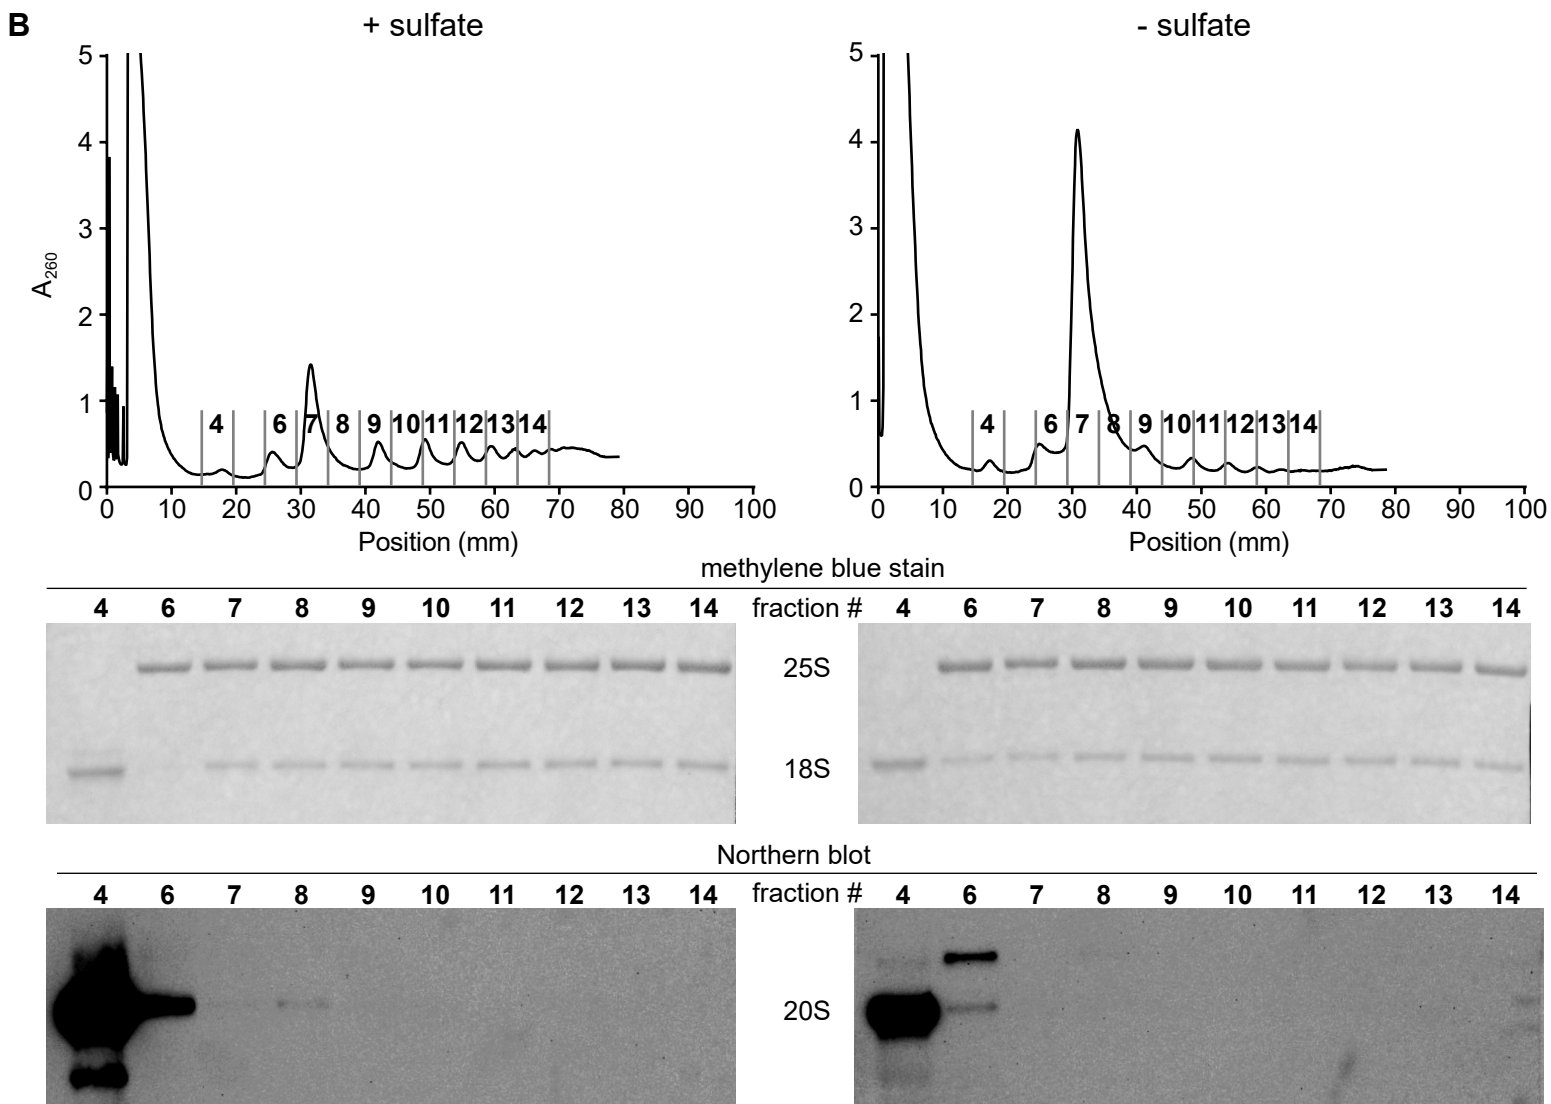

**Figure S4.  $m^6A$ -bearing ribosomes engage in active translation.** Related to Figure 3.

(A)  $m^6A/m_2^A$  resides close to the ribosome P-site. Structures of initiation and elongation complexes were adapted from PDB#3J81 (Hussain et al. 2014), and PDB#6Q8Y (Tesina et al. 2019), respectively, and prepared using Pymol (<https://pymol.org>). tRNA (P) and tRNA (E) occupy the P- and E-sites of the ribosome, respectively. (B) 20S rRNA is absent from polysome fractions under sulfate-replete and -starvation conditions. Cells were grown in complete medium to log phase and starved of sulfate for two hours. Samples were collected for polysome profiling as described in STAR METHODS. Sucrose fractions were extracted with an equal volume of phenol (pH 4.3)/chloroform and nucleic acids were precipitated with an equal volume of isopropanol. Northern blot was performed as described in STAR METHODS.

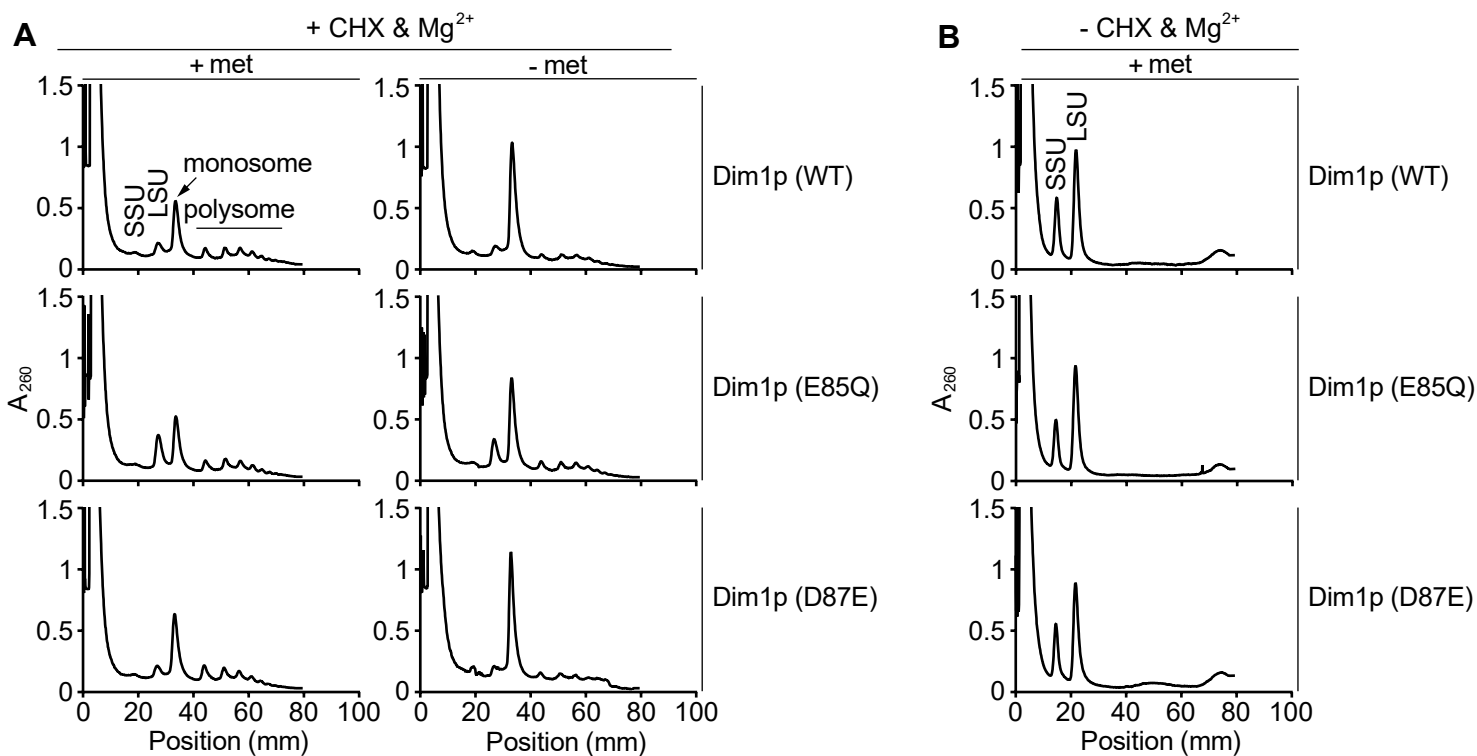

**Figure S5. Analysis of ribosome biogenesis in *dim1* mutants.** Related to Figure 4.

**(A)** Polysome profiling. SSU: small subunit (40S); LSU: large subunit (60S). Cells were grown in SFM and starved of methionine in SF for 2 h. Samples were collected for polysome profiling as described in STAR METHODS. **(B)** Ribosome subunit profiling. Cells were grown in SFM and collected without cycloheximide (CHX), and were lysed in the absence of magnesium to separate the two subunits.

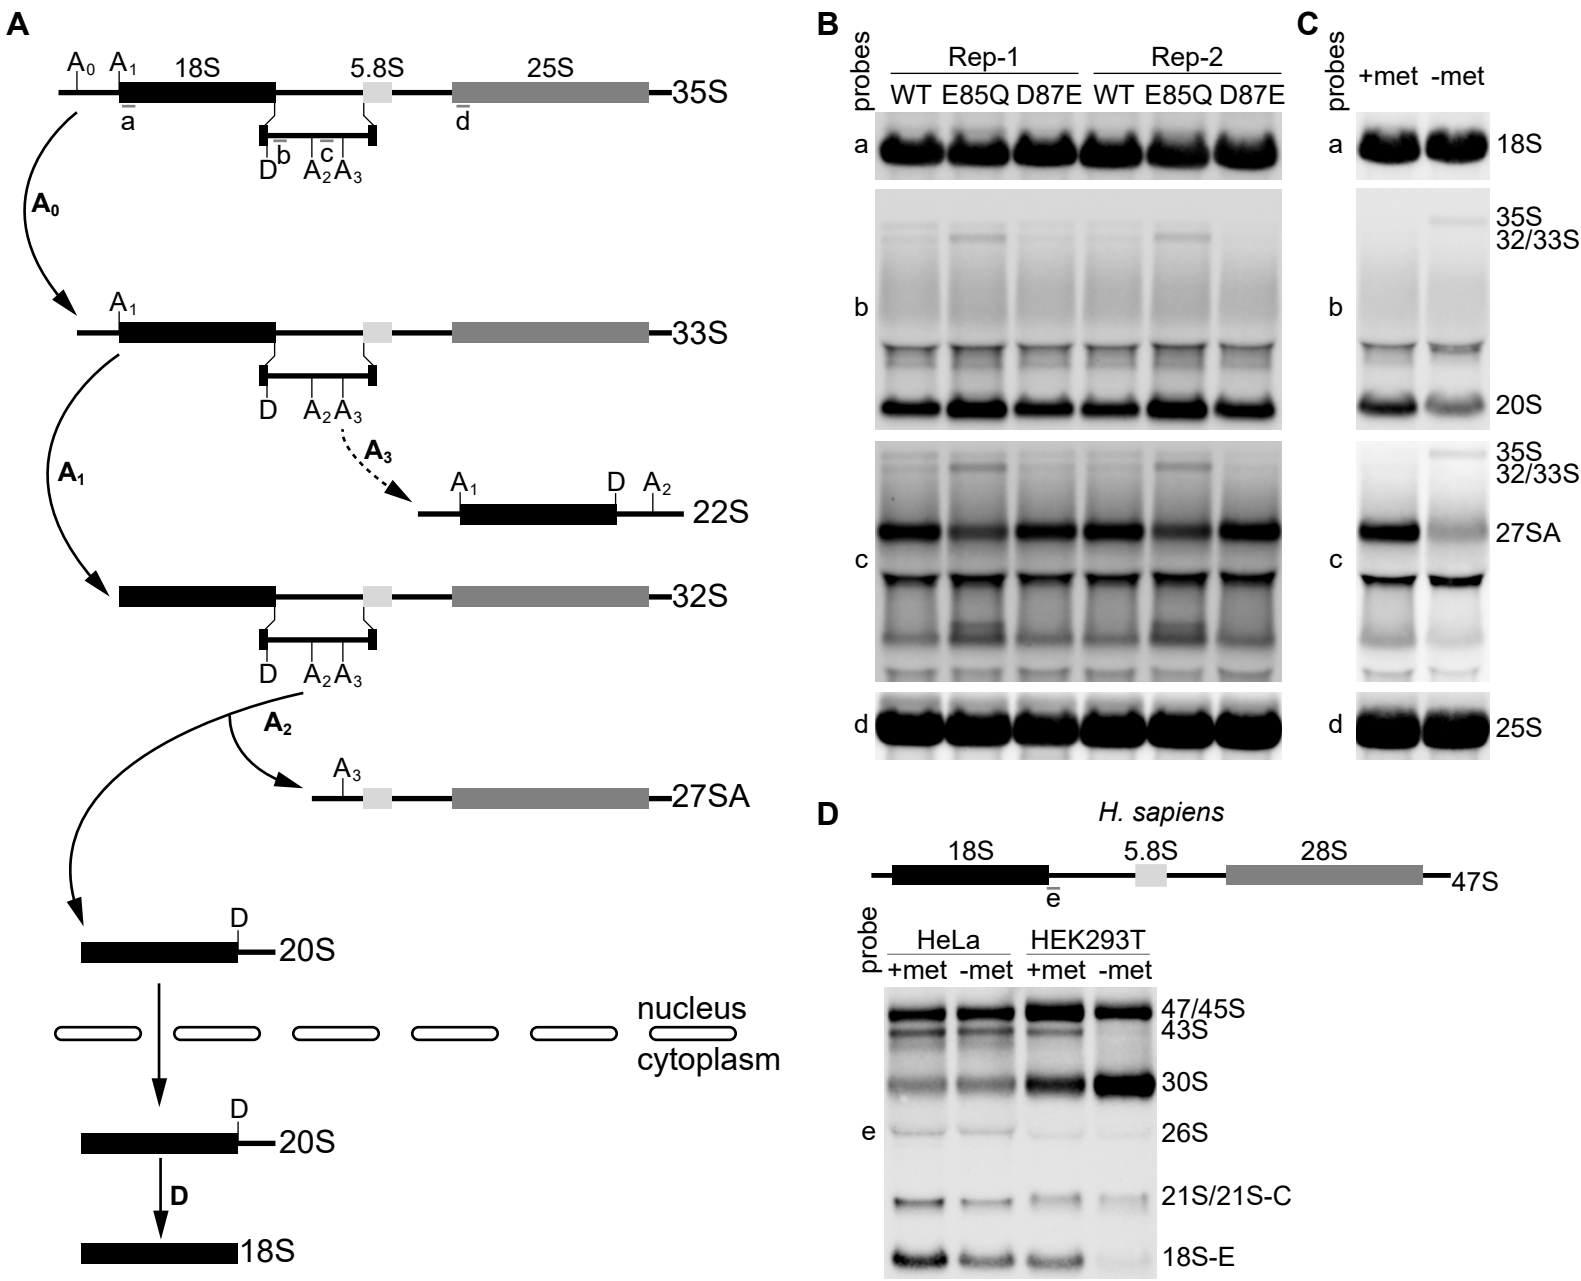

**Figure S6. Analysis of rRNA processing in yeast and human cell lines.** Related to Figure 4.  
**(A)** Simplified schematic of rRNA processing in yeast. Only relevant processing intermediates and cleavage sites were shown. Probes used for Northern blot were also indicated. The 22S pre-rRNA is thought to arise from cleavage at A3 of the 33S pre-rRNA, observed when Dim1p is depleted (Lafontaine et al., 1995). **(B)** The E85Q mutation, but not the D87E mutation causes rRNA processing defects. **(C)** Examination of rRNA processing in WT yeast cells grown with methionine and without methionine (2 h) using Northern blot. **(D)** Examination of rRNA processing in mammalian cell lines grown with and without methionine (6 h) using Northern blot.

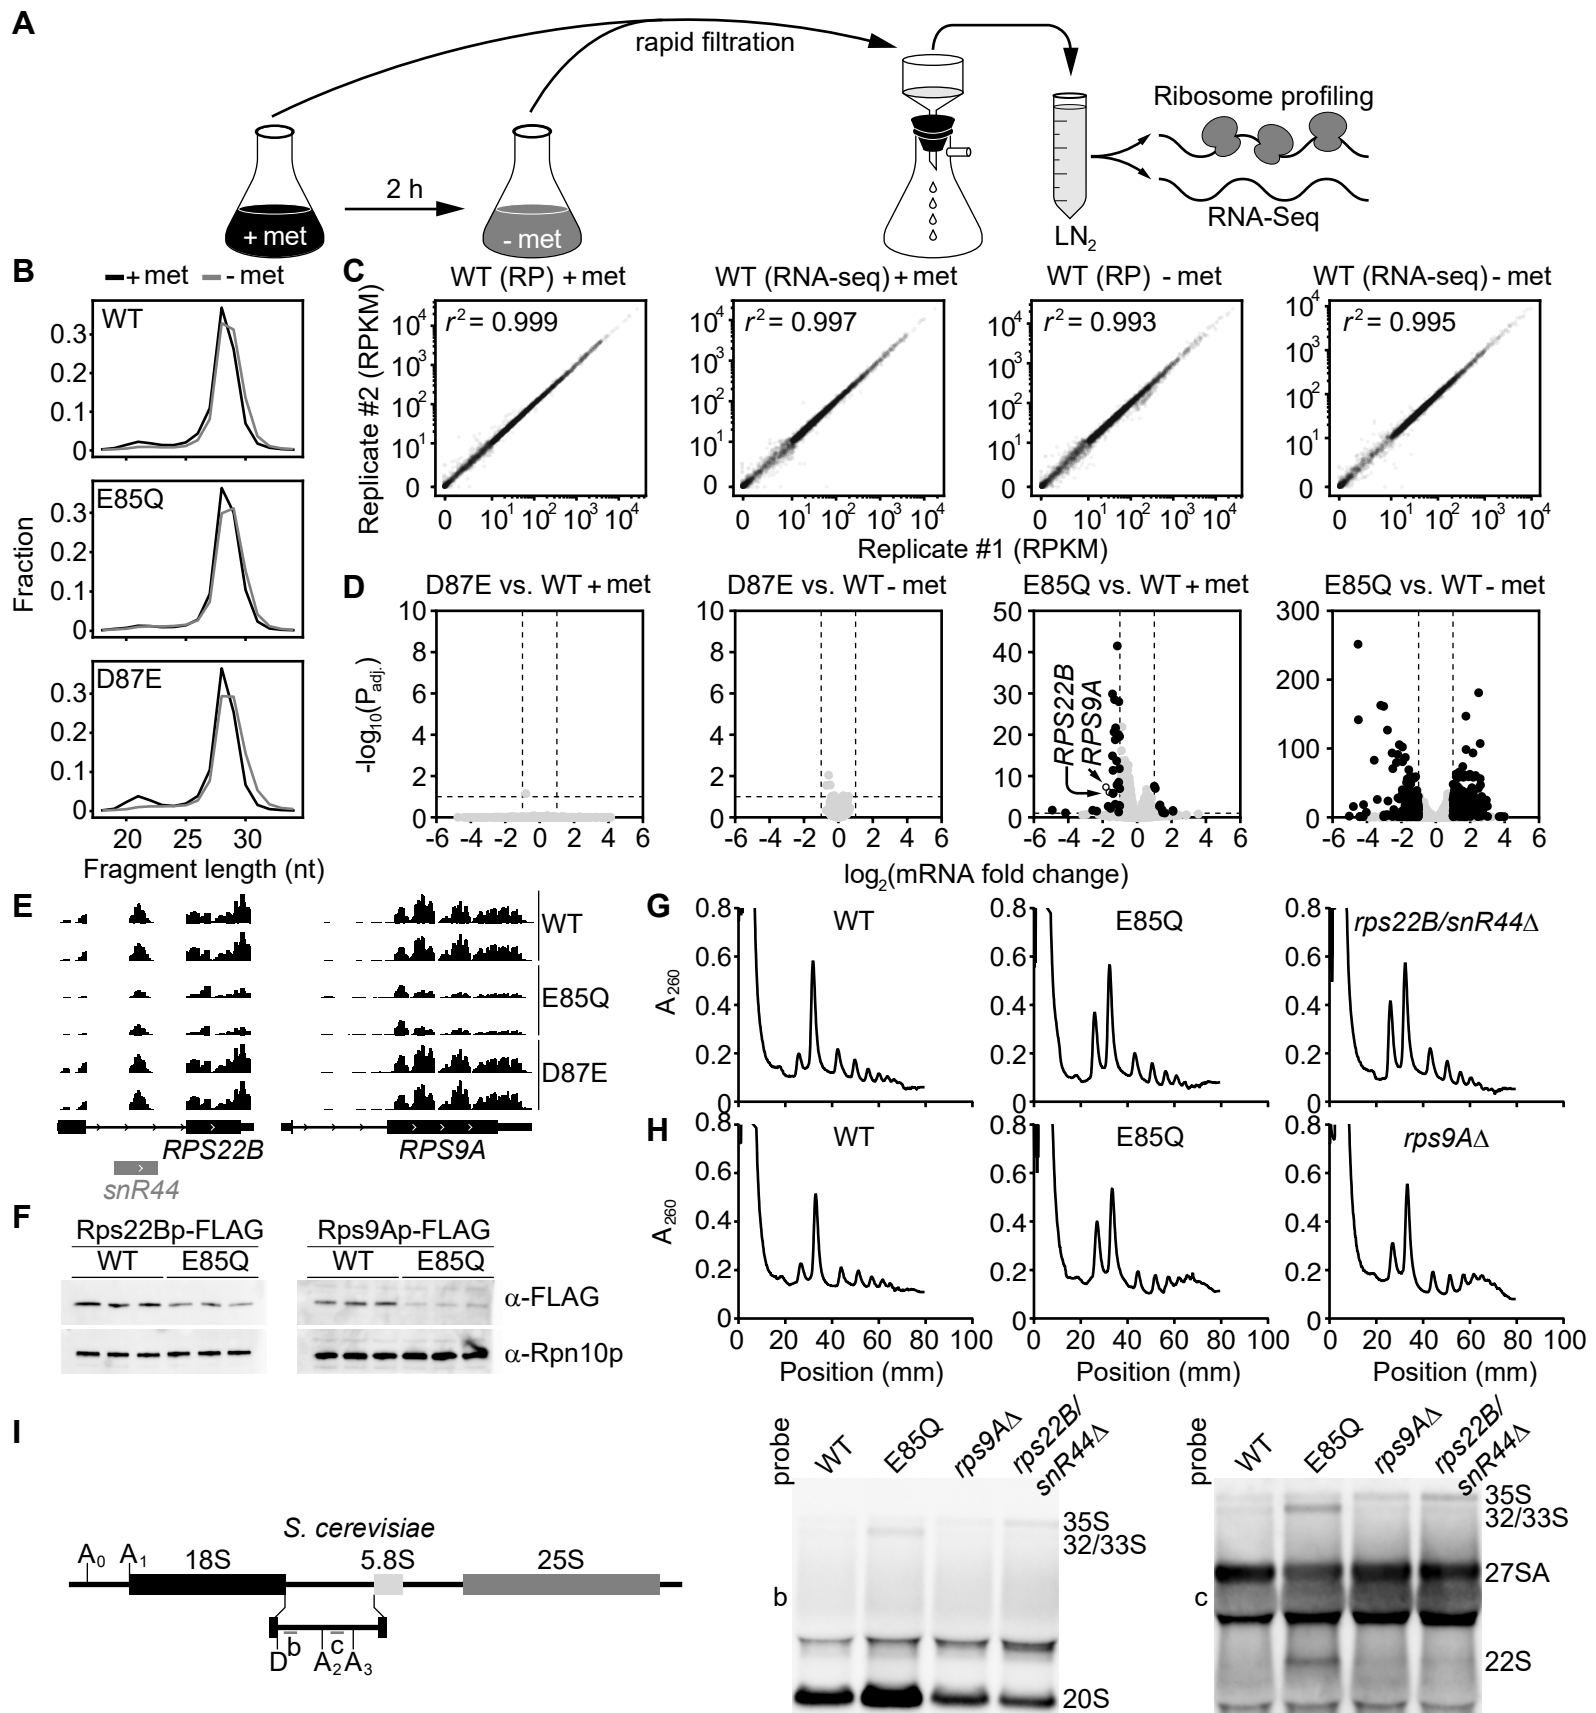

**Figure S7. Controls for ribosome profiling (RP) experiments.** Related to Figures 4 and 5.

(A) Schematic of ribosome profiling experiment. Cells were grown in SFM and starved of methionine in SF for 2 h. Samples were collected by rapid filtration followed by immersion in liquid nitrogen. See STAR METHODS for details. (B) Size distribution of ribosome-protected RNA fragments. One replicate is shown for each strain. (C) RP and RNA-seq data are highly reproducible between replicates. WT is shown as an example. (D) Impact of *dim1* mutations on the transcriptome under methionine-replete and -starvation conditions. Shown are relative mRNA changes compared to WT. A 10% false discovery rate ( $-\log_{10}(P_{\text{adj}}) \geq 1$ ) and 2-fold change were considered significant (highlighted in black). (E) Transcripts of *RPS22B/snR44* and *RPS9A* are lower in the E85Q mutant. Shown are RNA-seq tracks under methionine-replete conditions (two replicates for each genotype). (F) Rps22Bp and Rps9Ap are lower in the E85Q mutant. Cells were grown in SFM and collected for Western blot as described in STAR METHODS. The *rps22B/snR44* mutant (G) and *rps9A*Δ mutant (H) exhibit defects in SSU biogenesis. Cells were grown in SFM and collected for polysome profiling as described in STAR METHODS. (I) Examination of rRNA processing in *rps9A*Δ and *rps22B/snR44*Δ using Northern blot. Cells were grown in SFM and collected for Northern blot as described in STAR METHODS.



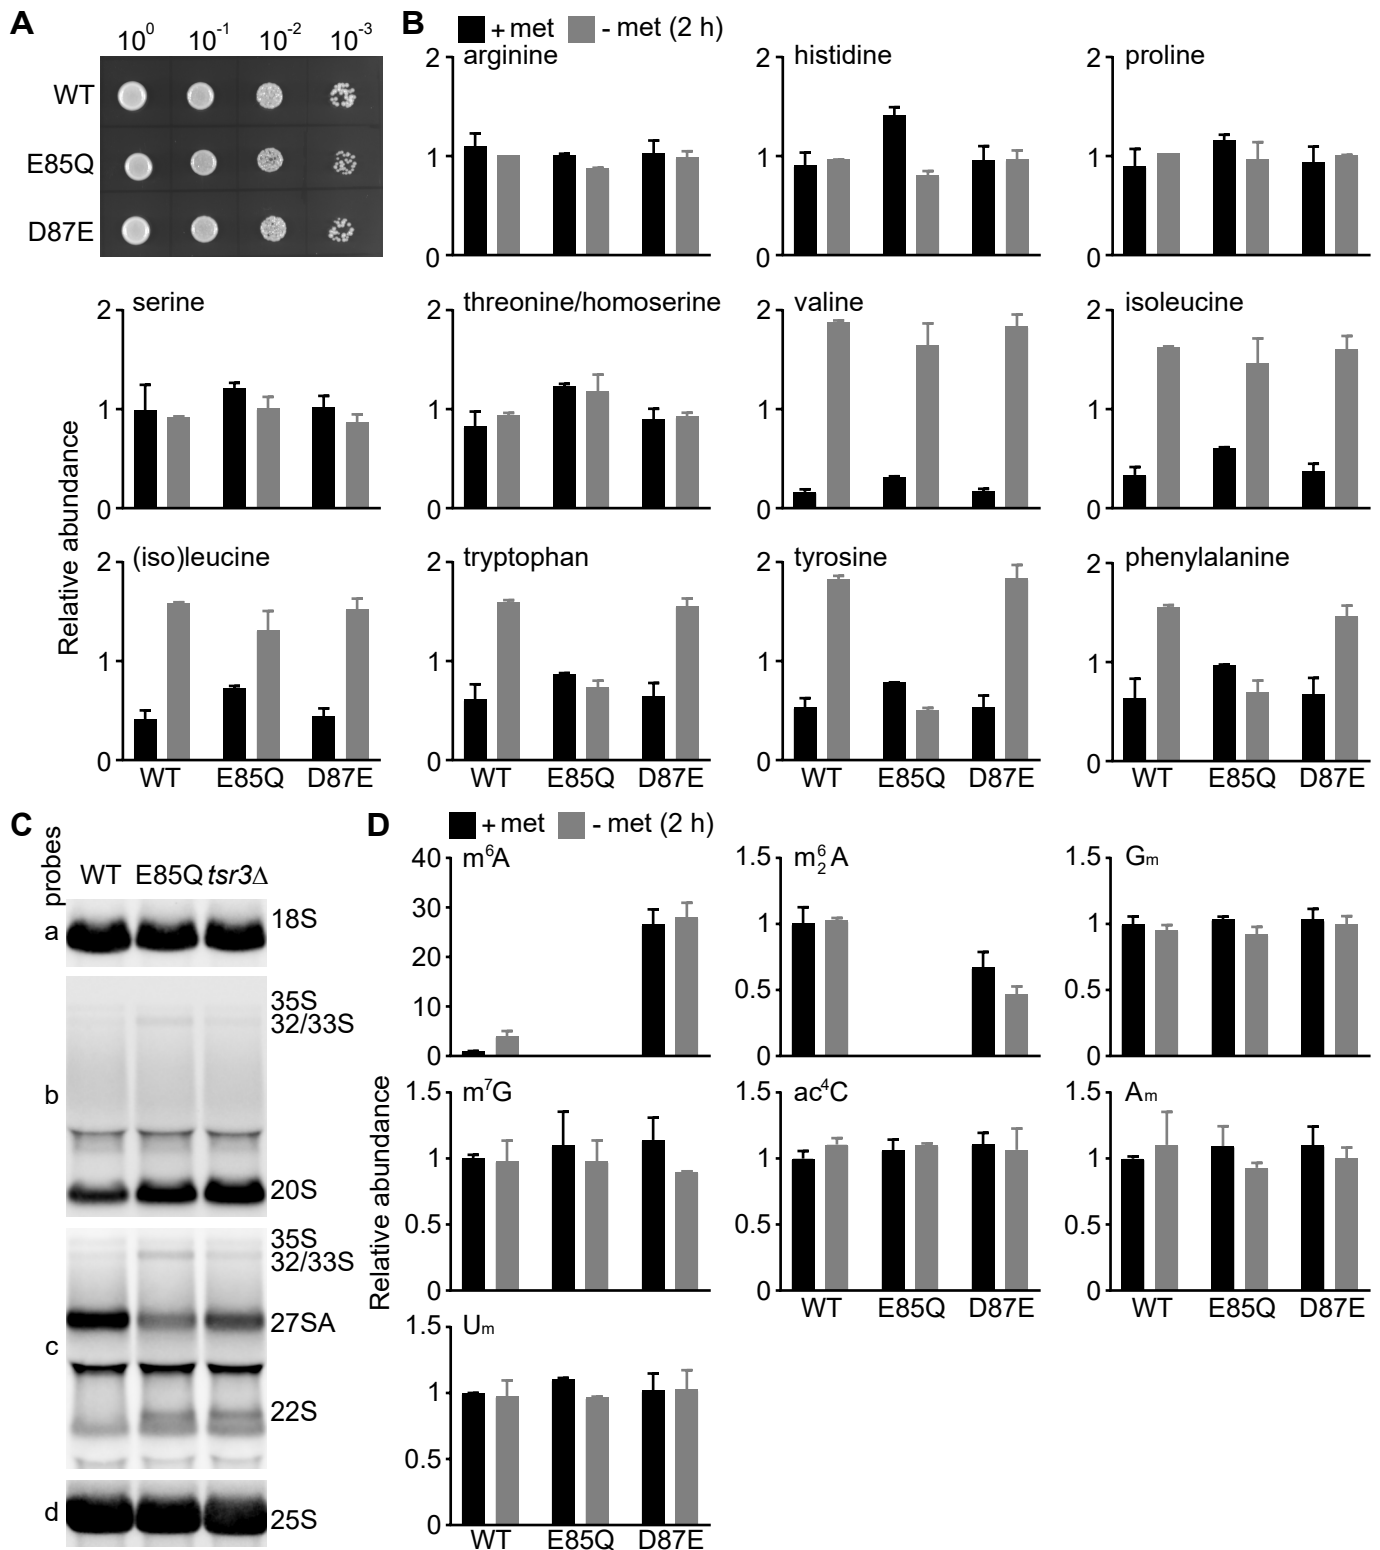

**Figure S8. Characterization of *dim1* mutants.** Related to Figures 3 and 5.

(A) The E85Q mutant grows slightly more slowly under nutrient replete condition. Cells were grown in SFM medium to log phase and washed with sterile water. Cells were adjusted to a final  $OD_{600}$  of 0.5 and serially diluted in water, before being plated onto an SD agar plate. (B) Levels of amino acids in *dim1* mutants under methionine-replete and -starvation conditions. Mean  $\pm$  s.d. ( $n = 2$  biological replicates). (C) Examination of rRNA processing in *tsr3Δ* mutant using Northern blot. Cells were grown in SFM and collected for Northern blot as described in STAR METHODS. (D) Changes in modified nucleosides in 18S rRNA. Cells were grown in SFM and shifted to SF for 2 h. 18S rRNA was isolated, digested, and analyzed by LC-MS/MS as described in STAR METHODS. Peak area of modified nucleosides was first normalized to that of adenosine and to WT with methionine.  $m^6A$  and  $m^6_2A$  from the E85Q mutant were at background levels and thus not shown. Mean  $\pm$  s.d. ( $n = 2$  biological replicates).

**A**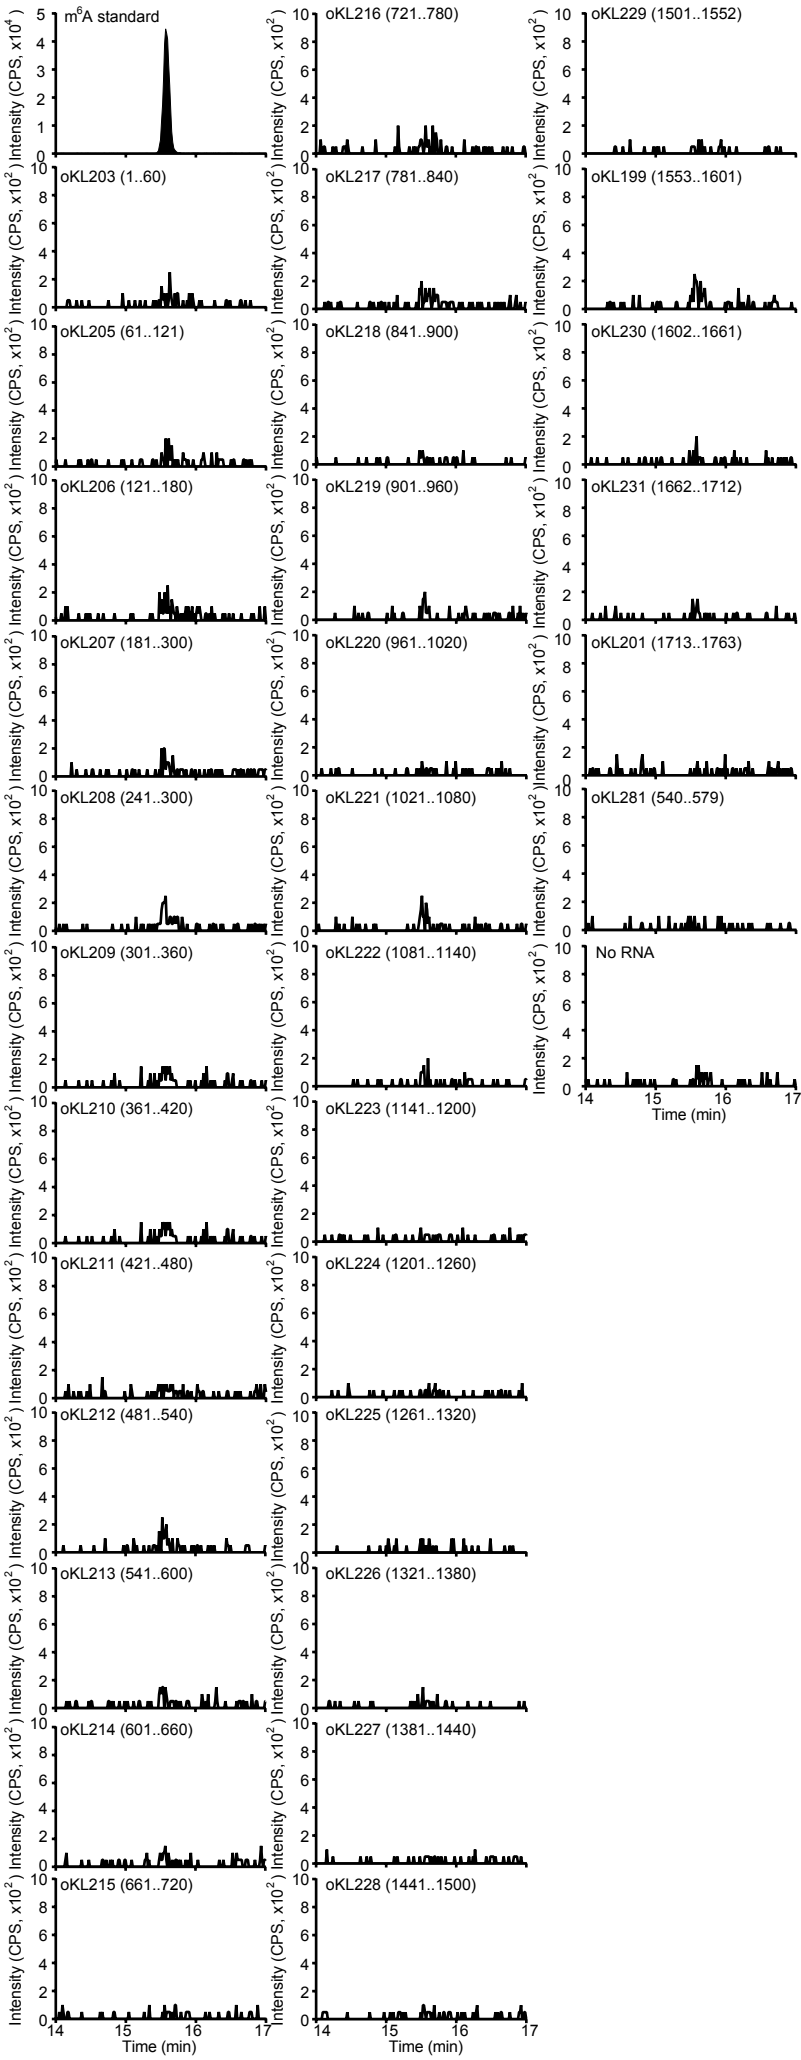**B**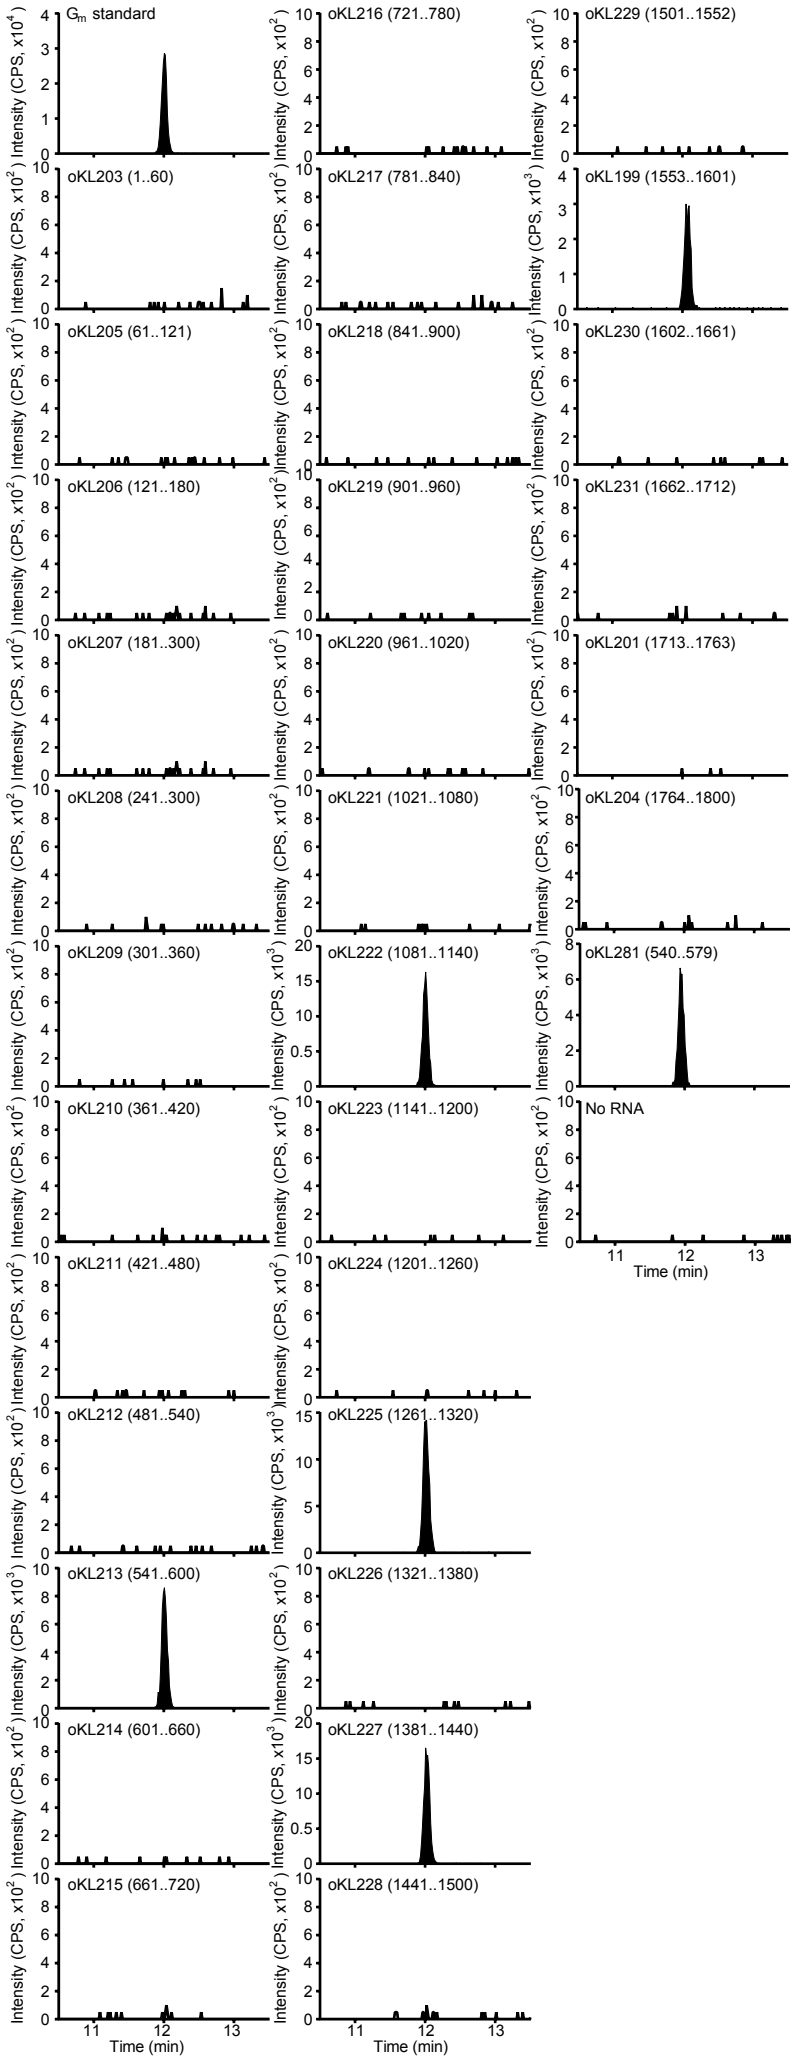

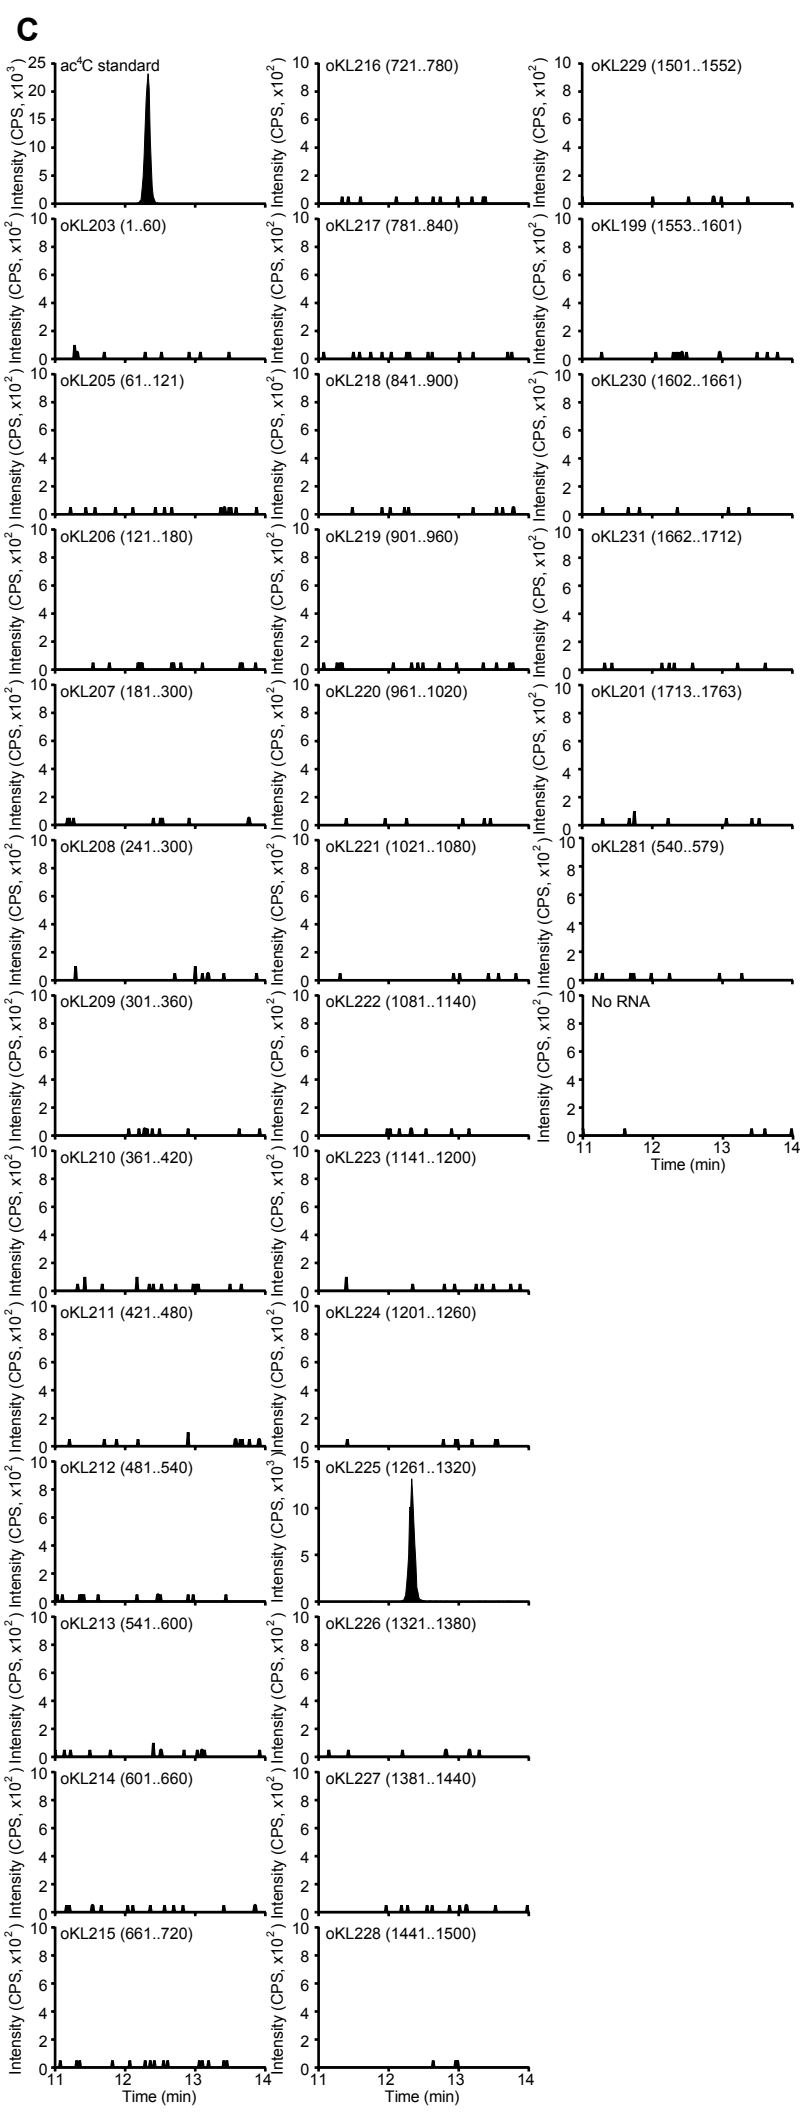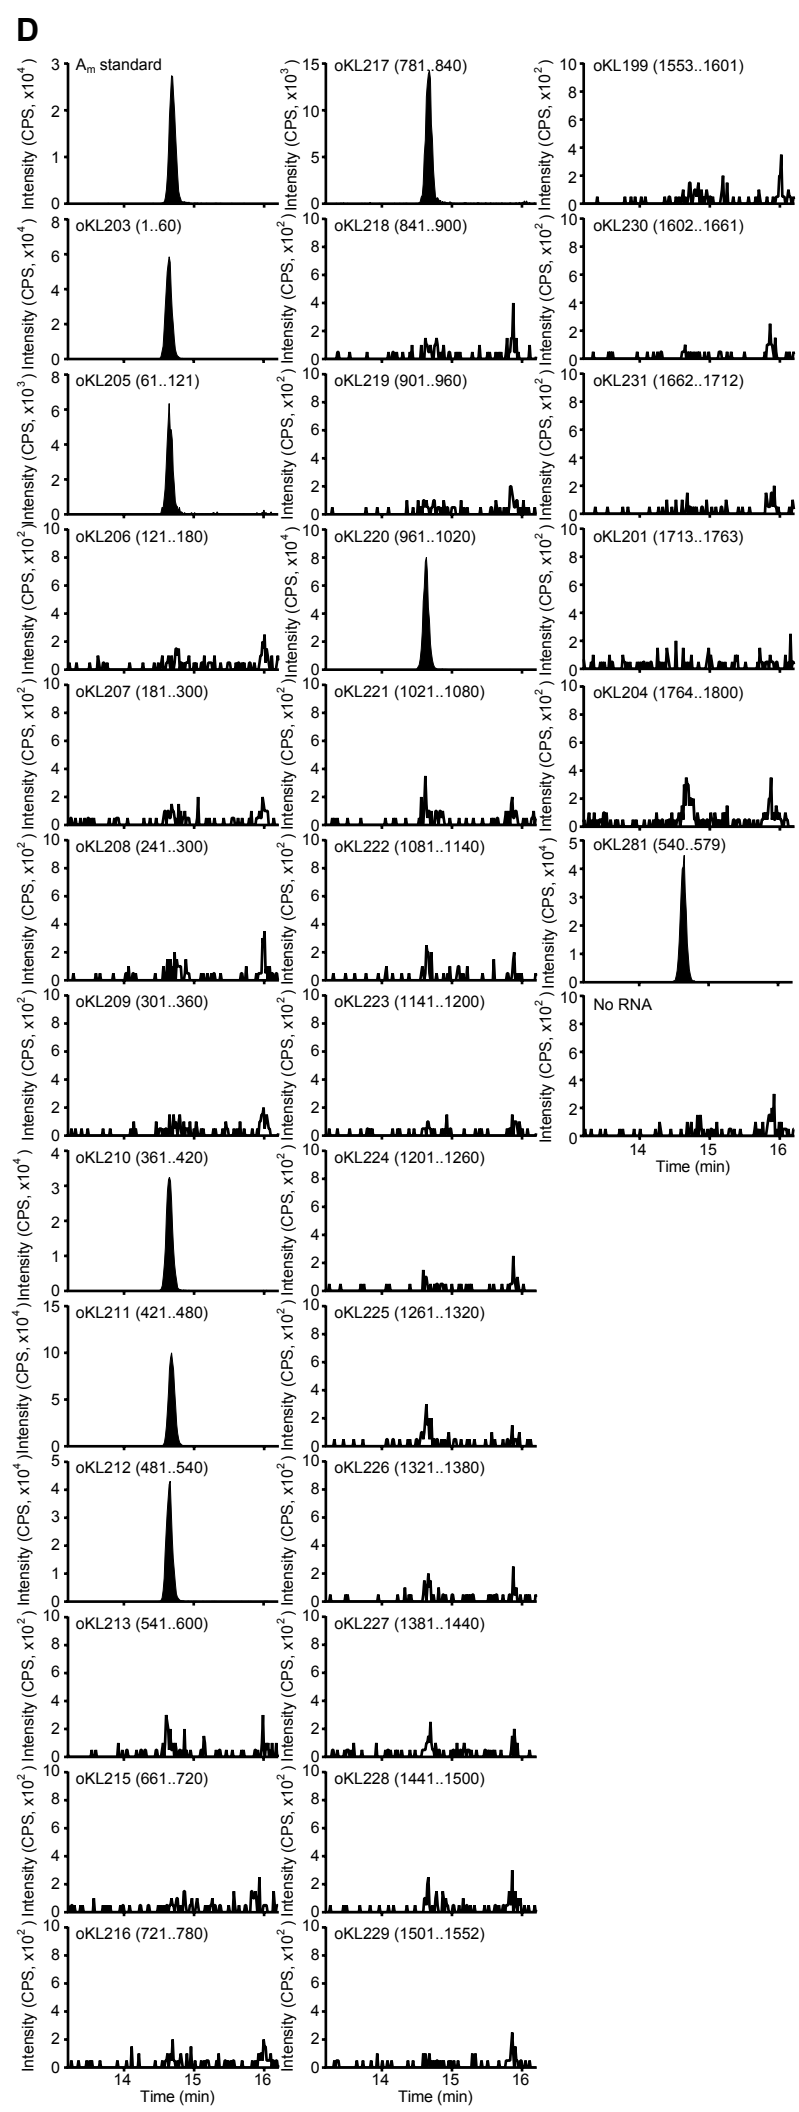

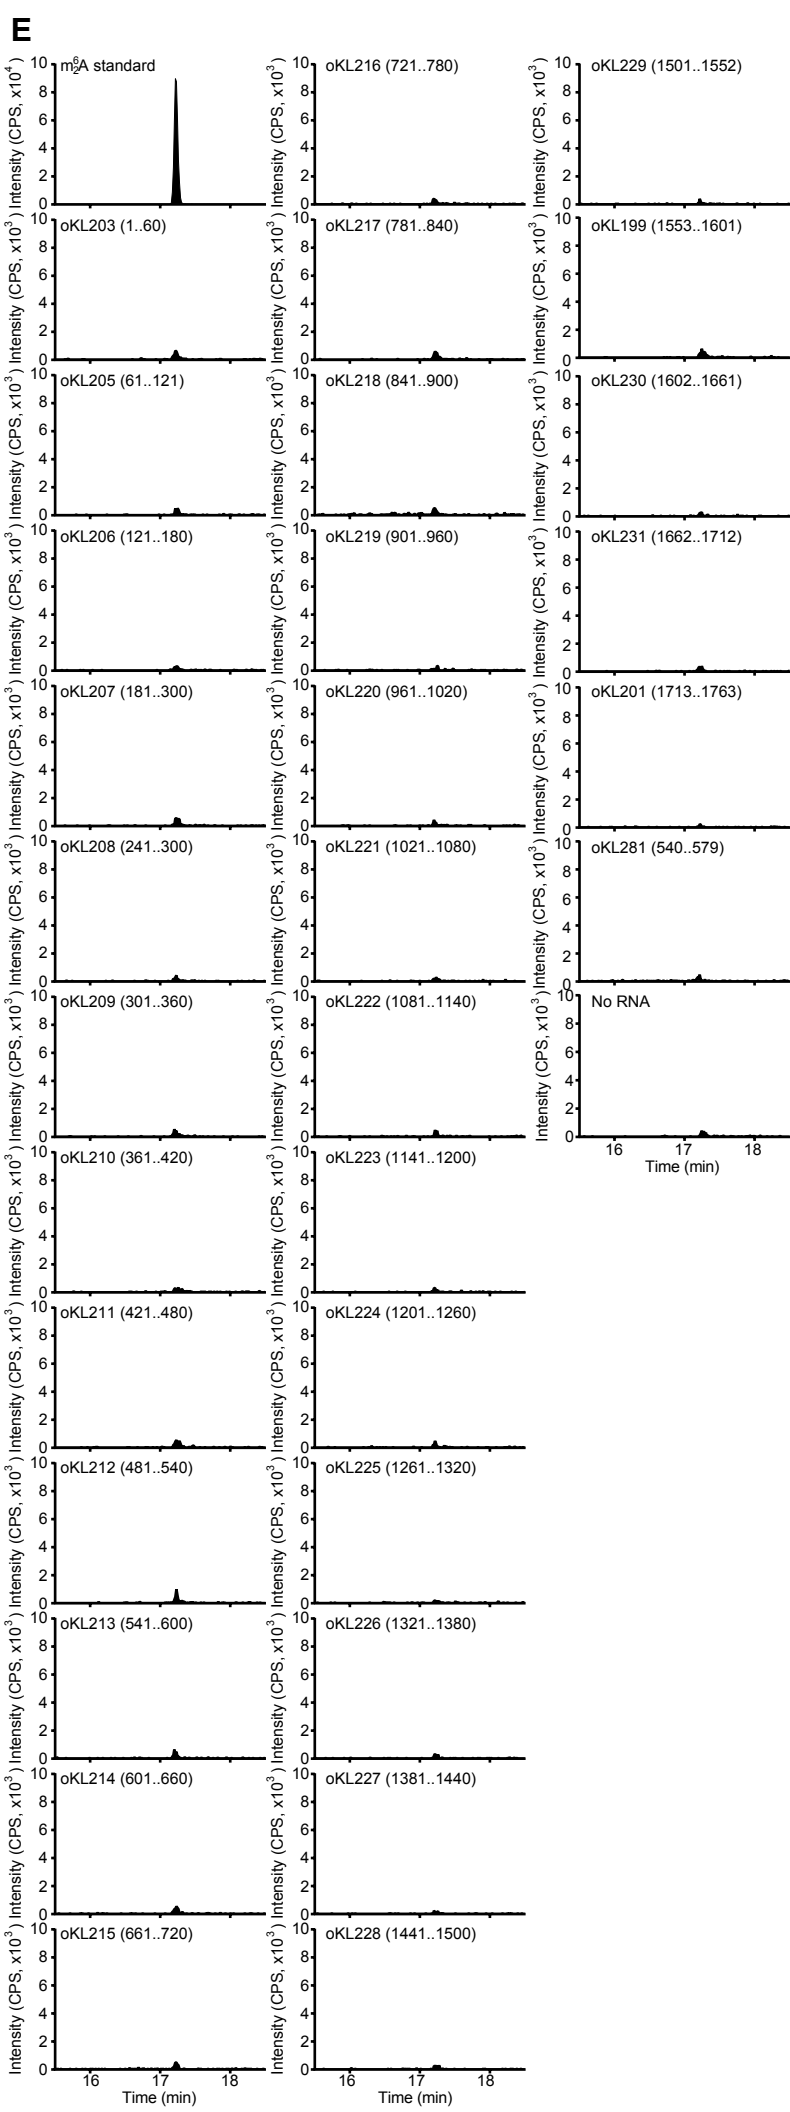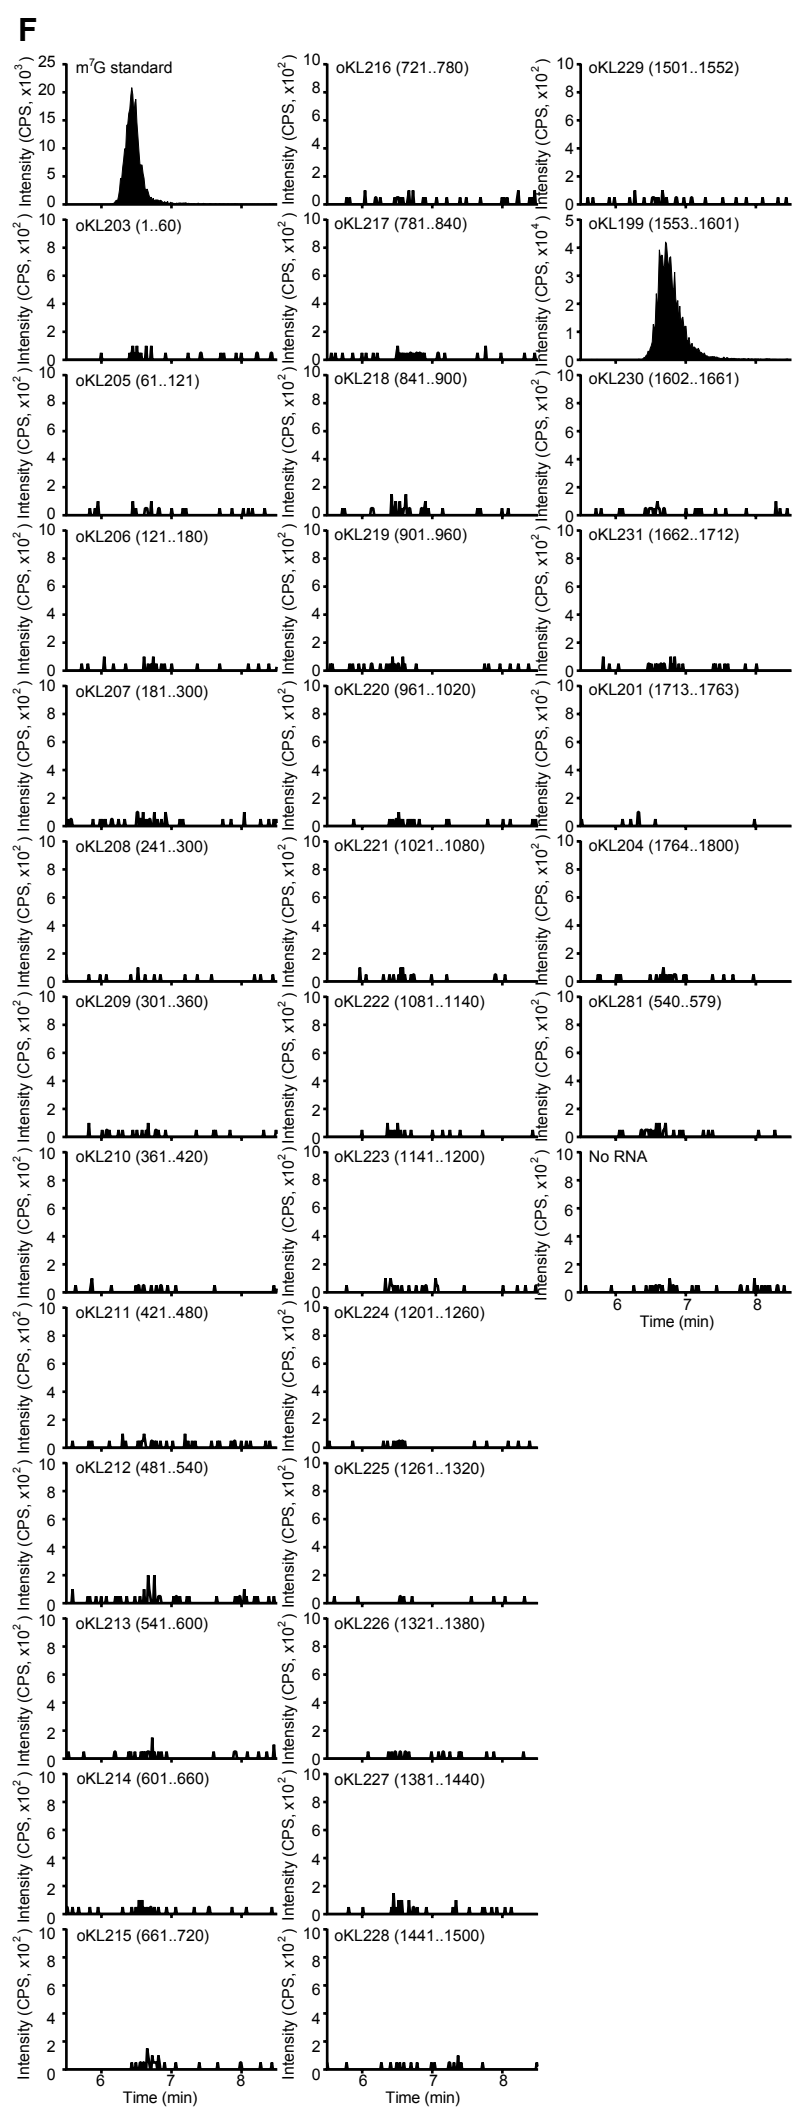

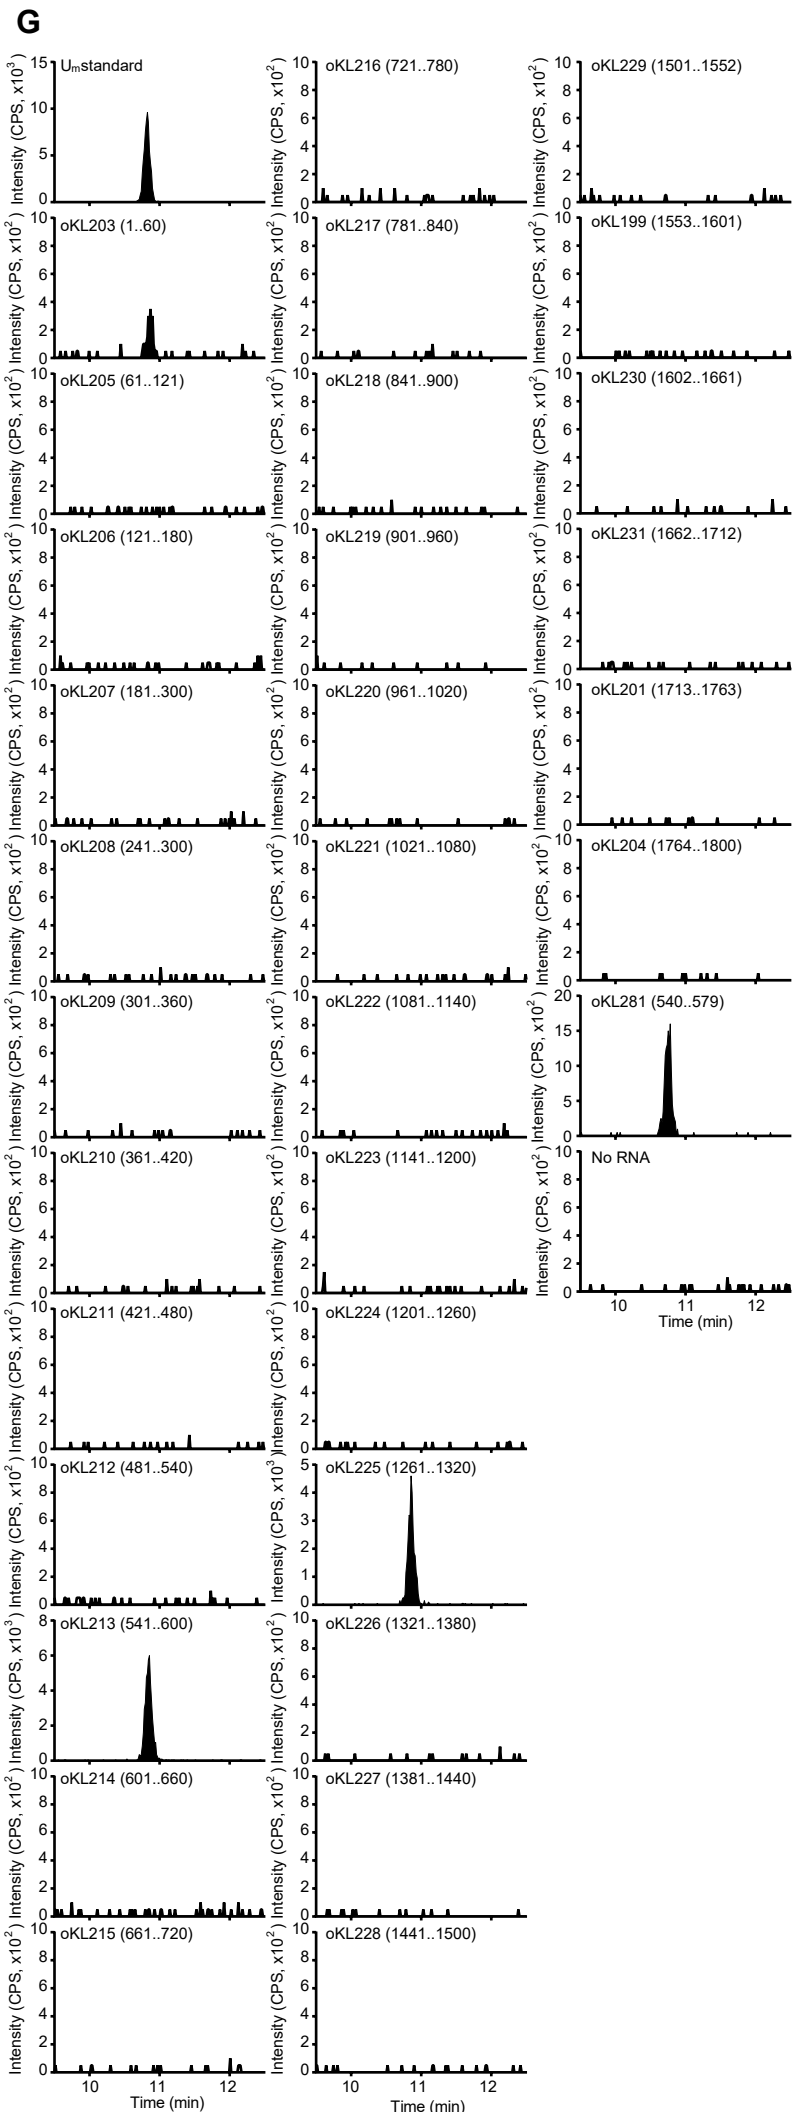

**Data S1. Chromatograms of MBN protection assay targeting  $m^6A$  (A),  $G_m$  (B),  $ac^cC$  (C),  $A_m$  (D),  $m_2^6A$  (E),  $m^7G$  (F), and  $U_m$  (G).** Related to Figure 1. All the modified nucleosides were detected in the expected regions of 18S rRNA according to Taoka et al. (2016). It should be noted that the  $A_m$  modification at 541 was not detected in oKL213-protected region (541..600), but in oKL212-protected region (481..540) and oKL281-protected region (540..579). This discrepancy is likely due to the imprecise trimming of the corresponding RNA/DNA ends in MBN protection assay.

**Table S4. Strains, plasmids, antibodies, and primers. Related to START METHODS.**

| Strains                        |                                                                                                    |                           |
|--------------------------------|----------------------------------------------------------------------------------------------------|---------------------------|
| Name                           | Genotype                                                                                           | References                |
| WT <sup>a</sup>                | <i>MATa</i> CEN.PK                                                                                 | (van Dijken et al., 2000) |
| KL139                          | <i>MATa/α</i> CEN.PK                                                                               | (van Dijken et al., 2000) |
| S288C                          | <i>MATα</i> <i>SUC2 mal mel gal2 CUP1 flo1 flo8-1 hap1</i>                                         | ATCC <sup>®</sup> 204508  |
| W303                           | <i>MATa bud4Δ::BUD4(S288C) can1-100</i>                                                            | (Korolev et al., 2012)    |
| WT <sup>b</sup>                | <i>MATa ho:: kanMX6-DIM1 dim1:: hygMX6</i>                                                         | This work                 |
| E85Q                           | <i>MATa ho:: kanMX6-dim1<sup>E85Q</sup> dim1:: hygMX6</i>                                          | This work                 |
| E85D                           | <i>MATa ho:: kanMX6-dim1<sup>E85D</sup> dim1:: hygMX6</i>                                          | This work                 |
| D87E                           | <i>MATa ho:: kanMX6-dim1<sup>D87E</sup> dim1:: hygMX6</i>                                          | This work                 |
| E85D D87E                      | <i>MATa ho:: kanMX6-dim1<sup>E85D D87E</sup> dim1:: hygMX6</i>                                     | This work                 |
| E85A                           | <i>MATa ho:: kanMX6-dim1<sup>E85A</sup> dim1:: hygMX6</i>                                          | This work                 |
| E85W                           | <i>MATa ho:: kanMX6-dim1<sup>E85W</sup> dim1:: hygMX6</i>                                          | This work                 |
| E85F                           | <i>MATa ho:: kanMX6-dim1<sup>E85F</sup> dim1:: hygMX6</i>                                          | This work                 |
| E85Y                           | <i>MATa ho:: kanMX6-dim1<sup>E85Y</sup> dim1:: hygMX6</i>                                          | This work                 |
| E85C                           | <i>MATa ho:: kanMX6-dim1<sup>E85C</sup> dim1:: hygMX6</i>                                          | This work                 |
| E85G                           | <i>MATa ho:: kanMX6-dim1<sup>E85G</sup> dim1:: hygMX6</i>                                          | This work                 |
| E85V                           | <i>MATa ho:: kanMX6-dim1<sup>E85V</sup> dim1:: hygMX6</i>                                          | This work                 |
| E85I                           | <i>MATa ho:: kanMX6-dim1<sup>E85I</sup> dim1:: hygMX6</i>                                          | This work                 |
| E85L                           | <i>MATa ho:: kanMX6-dim1<sup>E85L</sup> dim1:: hygMX6</i>                                          | This work                 |
| E85S                           | <i>MATa ho:: kanMX6-dim1<sup>E85S</sup> dim1:: hygMX6</i>                                          | This work                 |
| E85T                           | <i>MATa ho:: kanMX6-dim1<sup>E85T</sup> dim1:: hygMX6</i>                                          | This work                 |
| E85N                           | <i>MATa ho:: kanMX6-dim1<sup>E85N</sup> dim1:: hygMX6</i>                                          | This work                 |
| E85K                           | <i>MATa ho:: kanMX6-dim1<sup>E85K</sup> dim1:: hygMX6</i>                                          | This work                 |
| E85R                           | <i>MATa ho:: kanMX6-dim1<sup>E85R</sup> dim1:: hygMX6</i>                                          | This work                 |
| E85P                           | <i>MATa ho:: kanMX6-dim1<sup>E85P</sup> dim1:: hygMX6</i>                                          | This work                 |
| E85M                           | <i>MATa ho:: kanMX6-dim1<sup>E85M</sup> dim1:: hygMX6</i>                                          | This work                 |
| E85H                           | <i>MATa ho:: kanMX6-dim1<sup>E85H</sup> dim1:: hygMX6</i>                                          | This work                 |
| <i>sam1Δ sam2Δ</i>             | <i>MATa sam1::kanMX6 sam2::hygMX6</i>                                                              | This work                 |
| WT- <i>lacZ</i>                | <i>MATa ho::kanMX6-DIM1 dim1::hygMX6 x2::Ptef1-Ec lacZ-Tcyc1-natMX6<sup>6</sup></i>                | This work                 |
| E85D- <i>lacZ</i>              | <i>MATa ho::kanMX6-dim1<sup>E85D</sup> dim1::hygMX6 x2::Ptef1-Ec lacZ-Tcyc1-natMX6<sup>6</sup></i> | This work                 |
| E85Q- <i>lacZ</i>              | <i>MATa ho::kanMX6-dim1<sup>E85Q</sup> dim1::hygMX6 x2::Ptef1-Ec lacZ-Tcyc1-natMX6<sup>6</sup></i> | This work                 |
| D87E- <i>lacZ</i>              | <i>MATa ho::kanMX6-dim1<sup>D87E</sup> dim1::hygMX6 x2::Ptef1-Ec lacZ-Tcyc1-natMX6<sup>6</sup></i> | This work                 |
| WT-FLAG                        | <i>MATa ho:: kanMX6-DIM1-FLAG dim1::hygMX6</i>                                                     | This work                 |
| E85D-FLAG                      | <i>MATa ho:: kanMX6-dim1<sup>E85D</sup>-FLAG dim1:: hygMX6</i>                                     | This work                 |
| D87E-FLAG                      | <i>MATa ho:: kanMX6-dim1<sup>D87E</sup>-FLAG dim1:: hygMX6</i>                                     | This work                 |
| E85Q-FLAG                      | <i>MATa ho:: kanMX6-dim1<sup>E85Q</sup>-FLAG dim1:: hygMX6</i>                                     | This work                 |
| <i>gcd14Δ IMT4 OE</i>          | <i>MATa gcd14::hygMX6 2 micron-IMT4-kanMX6</i>                                                     | This work                 |
| <i>rrp8Δ ybr141cΔ</i>          | <i>MATa rrp8::kanMX6 ybr141c::hygMX6</i>                                                           | This work                 |
| WT <i>rps22B-3×FLAG</i>        | <i>MATa ho:: kanMX6-DIM1 dim1:: hygMX6 rps22B::3×FLAG-natMX6</i>                                   | This work                 |
| E85Q <i>rps22B-3×FLAG</i>      | <i>MATa ho:: kanMX6-dim1<sup>E85Q</sup> dim1:: hygMX6 rps22B::3×FLAG-natMX6</i>                    | This work                 |
| WT <i>rps9A-3×FLAG</i>         | <i>MATa ho:: kanMX6-DIM1 dim1:: hygMX6 rps9A::3×FLAG-natMX6</i>                                    | This work                 |
| E85Q <i>rps9A-3×FLAG</i>       | <i>MATa ho:: kanMX6-dim1<sup>E85Q</sup> dim1:: hygMX6 rps9A::3×FLAG-natMX6</i>                     | This work                 |
| <i>rps22BΔ pKL23 (H245R)</i>   | <i>MATa ho:: kanMX6-DIM1 dim1:: hygMX6 rps22B::natMX6 ura3:: Sh ble pKL23</i>                      | This work                 |
| <i>rps22BΔ pKL24 (control)</i> | <i>MATa ho:: kanMX6-DIM1 dim1:: hygMX6 rps22B::natMX6 ura3:: Sh ble pKL24</i>                      | This work                 |
| <i>rps9AΔ pKL23 (H245R)</i>    | <i>MATa ho:: kanMX6-DIM1 dim1:: hygMX6 rps9A::natMX6 ura3:: Sh ble pKL23</i>                       | This work                 |
| <i>rps9AΔ pKL24 (control)</i>  | <i>MATa ho:: kanMX6-DIM1 dim1:: hygMX6 rps9A::natMX6 ura3:: Sh ble pKL24</i>                       | This work                 |
| WT pKL23 (H245R)               | <i>MATa ho:: kanMX6-DIM1 dim1:: hygMX6 ura3:: natMX6 pKL23</i>                                     | This work                 |
| E85Q pKL23 (H245R)             | <i>MATa ho:: kanMX6-dim1<sup>E85Q</sup> dim1:: hygMX6 ura3:: natMX6 pKL23</i>                      | This work                 |
| D87E pKL23 (H245R)             | <i>MATa ho:: kanMX6-dim1<sup>D87E</sup> dim1:: hygMX6 ura3:: natMX6 pKL23</i>                      | This work                 |
| WT pKL24 (control)             | <i>MATa ho:: kanMX6-DIM1 dim1:: hygMX6 ura3:: natMX6 pKL24</i>                                     | This work                 |
| E85Q pKL24 (control)           | <i>MATa ho:: kanMX6-dim1<sup>E85Q</sup> dim1:: hygMX6 ura3:: natMX6 pKL24</i>                      | This work                 |
| D87E pKL24 (control)           | <i>MATa ho:: kanMX6-dim1<sup>D87E</sup> dim1:: hygMX6 ura3:: natMX6 pKL24</i>                      | This work                 |
| <i>tsr3Δ pKL23 (H245R)</i>     | <i>MATa ho:: kanMX6-DIM1 dim1:: hygMX6 tsr3::natMX6 ura3:: Sh ble pKL23</i>                        | This work                 |
| <i>tsr3Δ pKL24 (control)</i>   | <i>MATa ho:: kanMX6-DIM1 dim1:: hygMX6 tsr3::natMX6 ura3:: Sh ble pKL24</i>                        | This work                 |
| Plasmids                       |                                                                                                    |                           |
| Name                           | Description                                                                                        | References                |
| pFA6a- <i>hphMX6</i>           | To replace a gene of interest with the <i>hphMX6</i> gene                                          | (Longtine et al., 1998)   |
| pFA6a- <i>kanMX6</i>           | To replace a gene of interest with the <i>kanMX6</i> gene                                          | (Longtine et al., 1998)   |

|                                                        |                                                                                                    |                                 |
|--------------------------------------------------------|----------------------------------------------------------------------------------------------------|---------------------------------|
| pFA6a-natMX6                                           | To replace a gene of interest with the <i>natMX6</i> gene                                          | (Longtine et al., 1998)         |
| pUG66                                                  | To replace a gene of interest with the <i>Sh ble</i> gene                                          | (Gueldener et al., 2002)        |
| <i>HO-kanMX6-HO</i>                                    | To ectopically express a gene of interest at the <i>HO</i> locus                                   | (Voth et al., 2001)             |
| Control (aka. pDB722 or pKL24)                         | Control Dual-Luciferase reporter                                                                   | (Keeling et al., 2004)          |
| H245R (aka. pDB868 or pKL23)                           | Dual-Luciferase reporter for miscoding                                                             | (Salas-Marco and Bedwell, 2005) |
| 2 micron <i>IMT4-kanMX6</i>                            | To express <i>IMT4</i> with its 5' (~500 bp) and 3' (~300 bp) UTRs on a 2 micron plasmid           | This work                       |
| <i>HO-kanMX6-DIM1-HO</i>                               | To ectopically express <i>DIM1</i> with its 5' (~500 bp) and 3' (~300 bp) UTRs                     | This work                       |
| <i>HO-kanMX6-dim1<sup>ES5A</sup>-HO</i>                | To ectopically express <i>dim1<sup>ES5A</sup></i> with its 5' (~500 bp) and 3' (~300 bp) UTRs      | This work                       |
| <i>HO-kanMX6-dim1<sup>ES5G</sup>-HO</i>                | To ectopically express <i>dim1<sup>ES5G</sup></i> with its 5' (~500 bp) and 3' (~300 bp) UTRs      | This work                       |
| <i>HO-kanMX6-dim1<sup>ES5D</sup>-HO</i>                | To ectopically express <i>dim1<sup>ES5D</sup></i> with its 5' (~500 bp) and 3' (~300 bp) UTRs      | This work                       |
| <i>HO-kanMX6-dim1<sup>ES5V</sup>-HO</i>                | To ectopically express <i>dim1<sup>ES5V</sup></i> with its 5' (~500 bp) and 3' (~300 bp) UTRs      | This work                       |
| <i>HO-kanMX6-dim1<sup>ES5R</sup>-HO</i>                | To ectopically express <i>dim1<sup>ES5R</sup></i> with its 5' (~500 bp) and 3' (~300 bp) UTRs      | This work                       |
| <i>HO-kanMX6-dim1<sup>ES5S</sup>-HO</i>                | To ectopically express <i>dim1<sup>ES5S</sup></i> with its 5' (~500 bp) and 3' (~300 bp) UTRs      | This work                       |
| <i>HO-kanMX6-dim1<sup>ES5K</sup>-HO</i>                | To ectopically express <i>dim1<sup>ES5K</sup></i> with its 5' (~500 bp) and 3' (~300 bp) UTRs      | This work                       |
| <i>HO-kanMX6-dim1<sup>ES5N</sup>-HO</i>                | To ectopically express <i>dim1<sup>ES5N</sup></i> with its 5' (~500 bp) and 3' (~300 bp) UTRs      | This work                       |
| <i>HO-kanMX6-dim1<sup>ES5T</sup>-HO</i>                | To ectopically express <i>dim1<sup>ES5T</sup></i> with its 5' (~500 bp) and 3' (~300 bp) UTRs      | This work                       |
| <i>HO-kanMX6-dim1<sup>ES5M</sup>-HO</i>                | To ectopically express <i>dim1<sup>ES5M</sup></i> with its 5' (~500 bp) and 3' (~300 bp) UTRs      | This work                       |
| <i>HO-kanMX6-dim1<sup>ES5I</sup>-HO</i>                | To ectopically express <i>dim1<sup>ES5I</sup></i> with its 5' (~500 bp) and 3' (~300 bp) UTRs      | This work                       |
| <i>HO-kanMX6-dim1<sup>ES5Q</sup>-HO</i>                | To ectopically express <i>dim1<sup>ES5Q</sup></i> with its 5' (~500 bp) and 3' (~300 bp) UTRs      | This work                       |
| <i>HO-kanMX6-dim1<sup>ES5H</sup>-HO</i>                | To ectopically express <i>dim1<sup>ES5H</sup></i> with its 5' (~500 bp) and 3' (~300 bp) UTRs      | This work                       |
| <i>HO-kanMX6-dim1<sup>ES5P</sup>-HO</i>                | To ectopically express <i>dim1<sup>ES5P</sup></i> with its 5' (~500 bp) and 3' (~300 bp) UTRs      | This work                       |
| <i>HO-kanMX6-dim1<sup>ES5L</sup>-HO</i>                | To ectopically express <i>dim1<sup>ES5L</sup></i> with its 5' (~500 bp) and 3' (~300 bp) UTRs      | This work                       |
| <i>HO-kanMX6-dim1<sup>ES5C</sup>-HO</i>                | To ectopically express <i>dim1<sup>ES5C</sup></i> with its 5' (~500 bp) and 3' (~300 bp) UTRs      | This work                       |
| <i>HO-kanMX6-dim1<sup>ES5Y</sup>-HO</i>                | To ectopically express <i>dim1<sup>ES5Y</sup></i> with its 5' (~500 bp) and 3' (~300 bp) UTRs      | This work                       |
| <i>HO-kanMX6-dim1<sup>ES5F</sup>-HO</i>                | To ectopically express <i>dim1<sup>ES5F</sup></i> with its 5' (~500 bp) and 3' (~300 bp) UTRs      | This work                       |
| <i>HO-kanMX6-dim1<sup>ES5W</sup>-HO</i>                | To ectopically express <i>dim1<sup>ES5W</sup></i> with its 5' (~500 bp) and 3' (~300 bp) UTRs      | This work                       |
| <i>HO-kanMX6-dim1<sup>ES5D D87E</sup>-HO</i>           | To ectopically express <i>dim1<sup>ES5D D87E</sup></i> with its 5' (~500 bp) and 3' (~300 bp) UTRs | This work                       |
| <i>HO-kanMX6-dim1<sup>D87E</sup>-HO</i>                | To ectopically express <i>dim1<sup>D87E</sup></i> with its 5' (~500 bp) and 3' (~300 bp) UTRs      | This work                       |
| <i>HO-kanMX6-DIM1-FLAG-HO</i>                          | To ectopically express <i>DIM1-FLAG</i> with its 5' (~500 bp) and 3' (~300 bp) UTRs                | This work                       |
| <i>HO-kanMX6-dim1<sup>ES5D</sup>-FLAG-HO</i>           | To ectopically express <i>dim1<sup>ES5D</sup>-FLAG</i> with its 5' (~500 bp) and 3' (~300 bp) UTRs | This work                       |
| <i>HO-kanMX6-dim1<sup>ES5Q</sup>-FLAG-HO</i>           | To ectopically express <i>dim1<sup>ES5Q</sup>-FLAG</i> with its 5' (~500 bp) and 3' (~300 bp) UTRs | This work                       |
| <i>HO-kanMX6-dim1<sup>D87E</sup>-FLAG-HO</i>           | To ectopically express <i>dim1<sup>D87E</sup>-FLAG</i> with its 5' (~500 bp) and 3' (~300 bp) UTRs | This work                       |
| p417-P <sub>TEF1</sub> -lacZ-T <sub>CYC1</sub> -natMX6 | To express <i>Escherichia coli lacZ</i>                                                            | This work                       |

### Antibodies

| Name    | Description                | Cat. #        |
|---------|----------------------------|---------------|
| α-FLAG  | To detect the FLAG epitope | Sigma F1804   |
| α-G6pdh | To detect G6pdh            | Sigma A9521   |
| α-Rpn10 | To detect Rpn10p           | Abcam ab98843 |

### Primers

| Name   | Sequence (5' to 3')                                            | Note                    |
|--------|----------------------------------------------------------------|-------------------------|
| oKL169 | ATCCCCGGGTTAATTAAGGCGCGCCAGATCTGTTTAGCTTGCCTCGTCCC             |                         |
| oKL203 | AGACATGCATGGCTTAATCTTTGAGACAAGCATATGACTACTGGCAGGATCAACCAGATA   | 1..60 <sup>d</sup>      |
| oKL205 | ATAAACGATAACTGATTTAATGAGCCATTCGCAGTTTCACTGTATAAATTGCTTATACTT   | 61..120 <sup>d</sup>    |
| oKL206 | TTAAGCATGTATTAGCTCTAGAATTACCACAGTTATACCATGTAGTAAAGGAACTATCAA   | 121..180 <sup>d</sup>   |
| oKL207 | AGAGTCCGAAGACATTGATTTTTTATCTAATAAAATACATCTCTCCAAAGGGTTCGAGATT  | 181..240 <sup>d</sup>   |
| oKL208 | TTGAATGAACCATCGCCAGCACAAAGGCCATGCGATTGCGAAAAGTTATTATGAATCATCAA | 241..300 <sup>d</sup>   |
| oKL209 | TTACCCGTTGAAACCATGGTAGGCCACTATCCTACCATCGAAAGTTGATAGGCCAGAAAT   | 301..360 <sup>d</sup>   |
| oKL210 | TCCTTGGATGTGGTAGCCGTTTCTCAGGCTCCCTCTCCGGAATCGAACCCCTTATTCCCCG  | 361..420 <sup>d</sup>   |
| oKL211 | CGTTATTTATTGTCACTACCTCCCTGAATTAGGATTGGGTAATTTGCGCGCCTGCTGCCT   | 421..480 <sup>d</sup>   |
| oKL212 | CCTCGTTAAGGTATTTACATTGTACTCATTCCAATTACAAGACCCGAATGGGCCCTGTAT   | 481..540 <sup>d</sup>   |
| oKL213 | ATACGCTATTGGAGCTGGAATTACCGCGGCTGCTGGCACCAGACTTGCCCTCCAATTGTT   | 541..600 <sup>d</sup>   |
| oKL214 | CGGACCGGCCAACCCTGGGCCCAAAGTTCAACTACGAGCTTTTTAACTGCAACAACCTTAAT | 601..660 <sup>d</sup>   |
| oKL215 | CAAGGACTCAAGGTTAGCCAGAAGGAAAGCCCGTTGGAAATCCAGTACACGAAAAAAT     | 661..720 <sup>d</sup>   |
| oKL216 | TACGCTGCTTTGAACACTCTAATTTTTCAAAGTAAAGTCTGTTGCGCCAGAGCCA        | 721..780 <sup>d</sup>   |
| oKL217 | AACCAACAAAATAGAACCAAAAGTCTTATTCTATTATTCCATGCTAATATATTGAGCAA    | 781..840 <sup>d</sup>   |
| oKL218 | TCTGACAATTGAATACTGATGCCCCGACCGTCCCTATTAATCATTACGATGGTCTTAGA    | 841..900 <sup>d</sup>   |
| oKL219 | AAACGTCCTTGGCAAATGCTTTCGCAGTAGTTAGTCTTCAATAAAATCCAAGAATTTACC   | 901..960 <sup>d</sup>   |
| oKL220 | TTAAGACTACGACGGTATCTGATCATCTCGATCCCCTAATTTTCGTTCTTGATTAATGA    | 961..1020 <sup>d</sup>  |
| oKL221 | AAGGTGCCGAGTGGGTCATTAATAAAAAACACCACCCGATCCCTAGTCGGCATAGTTTATGG | 1021..1080 <sup>d</sup> |
| oKL222 | CTTTAAGTTTCAGCCTTGCACCATACTCCCCCAGAACCCAAAGACTTTGATTTCTCGT     | 1081..1140 <sup>d</sup> |
| oKL223 | CCCGTGTGAGTCAAATTAAGCCGAGGCTCCACTCCTGGTGGTGCCCTTCCGTCAATTC     | 1141..1200 <sup>d</sup> |

|        |                                                                         |                                      |
|--------|-------------------------------------------------------------------------|--------------------------------------|
| oKL224 | AAAATCAAGAAAGAGCTCTCAATCTGTCAATCCTTATTGTGTCTGGACCTGGTGAGTTTC            | 1201..1260 <sup>d</sup>              |
| oKL225 | ATCGCAATTAAGCAGACAAATCACTCCACCAACTAAGAACGGCCATGCACCACCACCCAC            | 1261..1320 <sup>d</sup>              |
| oKL226 | AGAAGTGGATAACCAGCAAATGCTAGCACCCTATTTAGTAGGTTAAGGTCTCGTTCGGT             | 1321..1380 <sup>d</sup>              |
| oKL227 | GGCATCACAGACCTGTTATTGCCCTCAAACCTCCATCGGCTTGAAACCGATAGTCCCTCTA           | 1381..1440 <sup>d</sup>              |
| oKL228 | GCCAAGGTTAGACTCGCTGGCTCCGTCAGTGTAGCGCGCGTGGCGCCGAGAACGTCTAAG            | 1441..1500 <sup>d</sup>              |
| oKL229 | AATGCTCTATCCCCAGCACGACGGAGTTTCACAAGATTACCAAGACCTCTCG                    | 1501..1552 <sup>d</sup>              |
| oKL199 | CTGATGACTTGGCGTTACTAGGAATTCCTCGTTGAAGAGCAATAATTAC                       | 1553..1601 <sup>d</sup>              |
| oKL230 | ATTCAATCGGTACTAGCGACGGGCGGTGTGTACAAAGGGCAGGGACGTAATCAACGCAAG            | 1602..1661 <sup>d</sup>              |
| oKL231 | TGAGATGGAGTTGCCCCCTTCTAAGCAGATCCTGAGGCCTCACTAAGCC                       | 1662..1712 <sup>d</sup>              |
| oKL201 | TTACGACTTTTAGTTCCTCTAAATGACCAAGTTTGTCCAAATTCTCCGCTC                     | 1713..1763 <sup>d</sup>              |
| oKL204 | TAATGATCCTTCCGCAGGTTACCTACGGAAACCTTG                                    | 1764..1800 <sup>d</sup>              |
| oKL235 | CCTACGGAAACCTTGTTACGACTTTTAGTTTCTCTAAATGACCAAGTTTG                      | 1729..1778 <sup>d</sup>              |
| oKL236 | TCACCTACGGAAACCTTGTTACGACTTTTAGTTTCTCTAAATGACCAAGTTTG                   | 1729..1781 <sup>d</sup>              |
| oKL237 | TTCACCTACGGAAACCTTGTTACGACTTTTAGTTTCTCTAAATGACCAAGTTTG                  | 1729..1782 <sup>d</sup>              |
| oKL242 | TCCGCAGGTTACCTACGGAAACCTTGTTACGACTTTTAGTTTCTCTAAATGACCAAGTTTG           | 1729..1790 <sup>d</sup>              |
| oKL243 | TTCCGCAGGTTACCTACGGAAACCTTGTTACGACTTTTAGTTTCTCTAAATGACCAAGTTTG          | 1729..1791 <sup>d</sup>              |
| oKL246 | TAATGATCCTTCCGCAGGTTACCTACGGAAACCTTGTTACGACTTTTAGTTTCTCTAAATGACCAAGTTTG | 1729..1800 <sup>d</sup>              |
| oKL261 | GCAAAAAACGTAGTGGCAGTAGCAATGGATCCCAGAATGGCTGC <sup>e</sup>               | <i>dim1</i> <sup>E85A</sup> (f)      |
| oKL262 | GCAGCCATTCTGGGATCCATTGCTACTGCCACTACGTTTTTTGC                            | <i>dim1</i> <sup>E85A</sup> (r)      |
| oKL506 | AACGTAGTGGCAGTATGGATGGATCCCAGAATG <sup>e</sup>                          | <i>dim1</i> <sup>E85W</sup> (f)      |
| oKL507 | CATTCTGGGATCCATCCACTGCCACTACGTT                                         | <i>dim1</i> <sup>E85W</sup> (r)      |
| oKL625 | AACGTAGTGGCAGTAGGTATGGATCCCAGAATG <sup>e</sup>                          | <i>dim1</i> <sup>E85G</sup> (f)      |
| oKL626 | CATTCTGGGATCCATACCTACTGCCACTACGTT                                       | <i>dim1</i> <sup>E85G</sup> (r)      |
| oKL627 | AACGTAGTGGCAGTAGATATGGATCCCAGAATG <sup>e</sup>                          | <i>dim1</i> <sup>E85D</sup> (f)      |
| oKL628 | CATTCTGGGATCCATATCTACTGCCACTACGTT                                       | <i>dim1</i> <sup>E85D</sup> (r)      |
| oKL629 | AACGTAGTGGCAGTAGTTATGGATCCCAGAATG <sup>e</sup>                          | <i>dim1</i> <sup>E85V</sup> (f)      |
| oKL630 | CATTCTGGGATCCATAACTACTGCCACTACGTT                                       | <i>dim1</i> <sup>E85V</sup> (r)      |
| oKL631 | AACGTAGTGGCAGTAAAGAATGGATCCCAGAATG <sup>e</sup>                         | <i>dim1</i> <sup>E85R</sup> (f)      |
| oKL632 | CATTCTGGGATCCATTCTTACTGCCACTACGTT                                       | <i>dim1</i> <sup>E85R</sup> (r)      |
| oKL633 | AACGTAGTGGCAGTATCTATGGATCCCAGAATG <sup>e</sup>                          | <i>dim1</i> <sup>E85S</sup> (f)      |
| oKL634 | CATTCTGGGATCCATAGATACTGCCACTACGTT                                       | <i>dim1</i> <sup>E85S</sup> (r)      |
| oKL635 | AACGTAGTGGCAGTAAAATGGATCCCAGAATG <sup>e</sup>                           | <i>dim1</i> <sup>E85K</sup> (f)      |
| oKL636 | CATTCTGGGATCCATTTTTACTGCCACTACGTT                                       | <i>dim1</i> <sup>E85K</sup> (r)      |
| oKL637 | AACGTAGTGGCAGTAAATATGGATCCCAGAATG <sup>e</sup>                          | <i>dim1</i> <sup>E85N</sup> (f)      |
| oKL638 | CATTCTGGGATCCATATTTACTGCCACTACGTT                                       | <i>dim1</i> <sup>E85N</sup> (r)      |
| oKL639 | AACGTAGTGGCAGTAACTATGGATCCCAGAATG <sup>e</sup>                          | <i>dim1</i> <sup>E85T</sup> (f)      |
| oKL640 | CATTCTGGGATCCATAGTTACTGCCACTACGTT                                       | <i>dim1</i> <sup>E85T</sup> (r)      |
| oKL641 | AACGTAGTGGCAGTAAATGATGGATCCCAGAATG <sup>e</sup>                         | <i>dim1</i> <sup>E85M</sup> (f)      |
| oKL642 | CATTCTGGGATCCATCATTACTGCCACTACGTT                                       | <i>dim1</i> <sup>E85M</sup> (r)      |
| oKL643 | AACGTAGTGGCAGTAAATATGGATCCCAGAATG <sup>e</sup>                          | <i>dim1</i> <sup>E85I</sup> (f)      |
| oKL644 | CATTCTGGGATCCATAATTACTGCCACTACGTT                                       | <i>dim1</i> <sup>E85I</sup> (r)      |
| oKL645 | AACGTAGTGGCAGTACAAATGGATCCCAGAATG <sup>e</sup>                          | <i>dim1</i> <sup>E85Q</sup> (f)      |
| oKL646 | CATTCTGGGATCCATTTGTACTGCCACTACGTT                                       | <i>dim1</i> <sup>E85Q</sup> (r)      |
| oKL647 | AACGTAGTGGCAGTACATATGGATCCCAGAATG <sup>e</sup>                          | <i>dim1</i> <sup>E85H</sup> (f)      |
| oKL648 | CATTCTGGGATCCATATGTACTGCCACTACGTT                                       | <i>dim1</i> <sup>E85H</sup> (r)      |
| oKL649 | AACGTAGTGGCAGTACCAATGGATCCCAGAATG <sup>e</sup>                          | <i>dim1</i> <sup>E85P</sup> (f)      |
| oKL650 | CATTCTGGGATCCATTGGTACTGCCACTACGTT                                       | <i>dim1</i> <sup>E85P</sup> (r)      |
| oKL651 | AACGTAGTGGCAGTATTGATGGATCCCAGAATG <sup>e</sup>                          | <i>dim1</i> <sup>E85L</sup> (f)      |
| oKL652 | CATTCTGGGATCCATCAATACTGCCACTACGTT                                       | <i>dim1</i> <sup>E85L</sup> (r)      |
| oKL653 | AACGTAGTGGCAGTATGTTATGGATCCCAGAATG <sup>e</sup>                         | <i>dim1</i> <sup>E85C</sup> (f)      |
| oKL654 | CATTCTGGGATCCATACATACTGCCACTACGTT                                       | <i>dim1</i> <sup>E85C</sup> (r)      |
| oKL655 | AACGTAGTGGCAGTATATATGGATCCCAGAATG <sup>e</sup>                          | <i>dim1</i> <sup>E85Y</sup> (f)      |
| oKL656 | CATTCTGGGATCCATATATACTGCCACTACGTT                                       | <i>dim1</i> <sup>E85Y</sup> (r)      |
| oKL657 | AACGTAGTGGCAGTATTTATGGATCCCAGAATG <sup>e</sup>                          | <i>dim1</i> <sup>E85F</sup> (f)      |
| oKL658 | CATTCTGGGATCCATAAAATACTGCCACTACGTT                                      | <i>dim1</i> <sup>E85F</sup> (r)      |
| oKL700 | GTGGCAGTAGAAAATGGAACCCAGAATGGCTGCA <sup>e</sup>                         | <i>dim1</i> <sup>D87E</sup> (f)      |
| oKL701 | TGCAGCCATTCTGGGTTCCATTTCTACTGCCAC                                       | <i>dim1</i> <sup>D87E</sup> (r)      |
| oKL698 | GTGGCAGTAGATATGGAACCCAGAATGGCTGCA <sup>e</sup>                          | <i>dim1</i> <sup>E85D,D87E</sup> (f) |
| oKL699 | TGCAGCCATTCTGGGTTCCATATCTACTGCCAC                                       | <i>dim1</i> <sup>E85D,D87E</sup> (r) |

**Probes for Northern blot**

| Name | Sequence (5' to 3')                                     | Target region  |
|------|---------------------------------------------------------|----------------|
| a    | [btm]TACTTAGACATGCATGGCTTAATCTTTGAGACAAGCATATGACTACTGGC | yeast 18S rRNA |



---

|   |                                                         |                    |
|---|---------------------------------------------------------|--------------------|
| b | [btm]GACTCTCCATCTCTTGTCTTCTTGCCAGTAAAAGCTCTCATGCTCTTGC  | yeast 20S pre-rRNA |
| c | [btm]CTCTGGGCCCCGATTGCTCGAATGCCCAAAGAAAAAGTTGCAAAGATATG | yeast ITS1 (A2&A3) |
| d | [btm]GTTACTAAGGCAATCCCGGTTGGTTCTTTTCTCCGCTTATTGATATGC   | yeast 25S rRNA     |
| e | [btm]CCTCGCCCTCCGGGCTCCGTTAATGATCCT                     | Human ITS1         |

---

<sup>a</sup>This strain was used throughout this work except when mutant *dim1* strains were investigated.

<sup>b</sup>This strain was used only for comparison with mutant *dim1* strains.

<sup>c</sup>The *x2* site is the integration site for the *E. coli lacZ* gene on chromosome X, between *NCA3* and *ASF1*, precisely encompassing from 605 to 646 nucleotides upstream of the *NCA3* start codon. It was previously examined by Mikkelsen et al., who reported that ectopic expression at this site did not cause growth defects (Mikkelsen et al., 2012).

<sup>d</sup>Numbers correspond to nucleotide positions in yeast 18S rRNA.

<sup>e</sup>The mutated codon is underlined in the forward primer. (f): forward primer; (r): reverse primer

**Table S5. Medium formula<sup>a</sup>.** Related to STAR METHODS.

|                                                     | complete | -C    | -N     | -P    | -S (sulfur free) |
|-----------------------------------------------------|----------|-------|--------|-------|------------------|
| salts (g L <sup>-1</sup> )                          |          |       |        |       |                  |
| CaCl <sub>2</sub> •2H <sub>2</sub> O                | 0.1      | 0.1   | 0.1    | 0.1   | 0.1              |
| NaCl                                                | 0.1      | 0.1   | 0.1    | 0.1   | 0.1              |
| MgCl <sub>2</sub> •6H <sub>2</sub> O                | 0.412    | 0.412 | 0.412  | 0.412 | 0.412            |
| (NH <sub>4</sub> ) <sub>2</sub> SO <sub>4</sub>     | 5        | 5     | 0      | 5     | 0                |
| Na <sub>2</sub> SO <sub>4</sub>                     | 0        | 0     | 5.4    | 0     | 0                |
| NH <sub>4</sub> Cl                                  | 0        | 0     | 0      | 0     | 4.05             |
| KH <sub>2</sub> PO <sub>4</sub>                     | 1        | 1     | 1      | 0     | 1                |
| KCl                                                 | 0        | 0     | 0      | 0.55  | 0                |
| metals (mg L <sup>-1</sup> )                        |          |       |        |       |                  |
| boric acid                                          |          |       | 0.5    |       |                  |
| CuCl <sub>2</sub> •2H <sub>2</sub> O                |          |       | 0.0273 |       |                  |
| KI                                                  |          |       | 0.1    |       |                  |
| FeCl <sub>3</sub> •6H <sub>2</sub> O                |          |       | 0.2    |       |                  |
| MnCl <sub>2</sub> •4H <sub>2</sub> O                |          |       | 0.4684 |       |                  |
| Na <sub>2</sub> MoO <sub>4</sub> •2H <sub>2</sub> O |          |       | 0.2    |       |                  |
| ZnCl <sub>2</sub> •H <sub>2</sub> O                 |          |       | 0.1895 |       |                  |
| vitamins (mg L <sup>-1</sup> )                      |          |       |        |       |                  |
| biotin                                              |          |       | 0.002  |       |                  |
| calcium pantothenate                                |          |       | 0.4    |       |                  |
| folic acid                                          |          |       | 0.002  |       |                  |
| inositol                                            |          |       | 2      |       |                  |
| niacin                                              |          |       | 0.4    |       |                  |
| 4-aminobenzoic acid                                 |          |       | 0.2    |       |                  |
| pyridoxine HCl                                      |          |       | 0.4    |       |                  |
| riboflavin                                          |          |       | 0.2    |       |                  |
| thiamine-HCl                                        |          |       | 0.4    |       |                  |

<sup>a</sup>Formula is based on Miller et al. (Miller et al., 2013) with sulfate ions replaced by chloride ions.

**Table S6. MRM transitions for nucleosides and metabolites. Related to STAR METHODS.**

| Compounds                                                                                        | Q1  | Q3  | [U- <sup>15</sup> N]-Q1 | [U- <sup>15</sup> N]-Q3 |
|--------------------------------------------------------------------------------------------------|-----|-----|-------------------------|-------------------------|
| <i>N</i> <sup>6</sup> -methyladenosine (m <sup>6</sup> A)                                        | 282 | 150 | 287                     | 155                     |
| <i>N</i> <sup>4</sup> -acetylcytidine (ac <sup>4</sup> C)                                        | 286 | 154 | 289                     | 157                     |
| <i>N</i> <sup>6</sup> , <i>N</i> <sup>6</sup> -dimethyladenosine (m <sup>6</sup> <sub>2</sub> A) | 296 | 164 | 301                     | 169                     |
| <i>N</i> <sup>1</sup> -methyladenosine (m <sup>1</sup> A)                                        | 282 | 150 |                         |                         |
| 2'-O-methyladenosine (A <sub>m</sub> )                                                           | 282 | 136 |                         |                         |
| 2'-O-methylguanosine (G <sub>m</sub> )                                                           | 298 | 152 |                         |                         |
| 2'-O-methyluridine (U <sub>m</sub> )                                                             | 259 | 113 |                         |                         |
| <i>N</i> <sup>7</sup> -methylguanosine (m <sup>7</sup> G)                                        | 298 | 166 |                         |                         |
| adenosine                                                                                        | 268 | 136 |                         |                         |
| cytidine                                                                                         | 244 | 112 |                         |                         |
| uridine                                                                                          | 245 | 113 |                         |                         |
| guanosine                                                                                        | 284 | 152 |                         |                         |
| cysteine                                                                                         | 122 | 59  |                         |                         |
| methionine                                                                                       | 150 | 104 |                         |                         |
| homocysteine                                                                                     | 136 | 90  |                         |                         |
| cystathionine                                                                                    | 223 | 134 |                         |                         |
| SAM                                                                                              | 399 | 250 |                         |                         |
| SAH                                                                                              | 385 | 136 |                         |                         |
| GSH                                                                                              | 308 | 179 |                         |                         |
| GSSG                                                                                             | 613 | 355 |                         |                         |
| proline                                                                                          | 116 | 70  |                         |                         |
| arginine                                                                                         | 175 | 116 |                         |                         |
| histidine                                                                                        | 156 | 110 |                         |                         |
| serine                                                                                           | 106 | 60  |                         |                         |
| threonine/homoserine                                                                             | 120 | 74  |                         |                         |
| isoleucine                                                                                       | 132 | 69  |                         |                         |
| (iso)leucine                                                                                     | 132 | 86  |                         |                         |
| valine                                                                                           | 118 | 55  |                         |                         |
| tryptophan                                                                                       | 205 | 188 |                         |                         |
| phenylalanine                                                                                    | 166 | 103 |                         |                         |
| tyrosine                                                                                         | 182 | 136 |                         |                         |
